1 **Forensic features and genetic legacy of the Baloch population of Pakistan and the Hazara**  
2 **population across Durand-line revealed by Y chromosomal STRs**

3

4 Atif Adnan<sup>1\*</sup>, Shao-Qing Wen<sup>2</sup>, Allah Rakha<sup>3</sup>, Rashed Alghafri<sup>4</sup>, Shahid Nazir<sup>3</sup>, Muhammad  
5 Rehman<sup>5</sup>, Chuan-Chao Wang<sup>6</sup>, and Jie Lu<sup>1\*</sup>

6 1. Department of Human Anatomy, School of Basic Medicine, China Medical University, Shenyang, Liaoning  
7 110122, P.R. China

8 2. Institute of Archaeological Science, Fudan University, Shanghai 200433, China

9 3. Department of Forensic Sciences, University of Health Sciences Lahore, 54600 Lahore, Pakistan

10 4. Dubai Police General Head Quarters, General Department of Forensic Sciences and Criminology, Dubai,  
11 United Arab Emirates

12 5. Forensic Medicine Directorate, Ministry of Public Health, Kabul, Afghanistan

13 6. Department of Anthropology and Ethnology, Institute of Anthropology, National Institute for Data Science  
14 in Health and Medicine, Xiamen University, Xiamen 361005, PR China

15

16

17 \*Corresponding authors:

18 Jie Lu ([lvjie@cmu.edu.cn](mailto:lvjie@cmu.edu.cn))

19 Atif Adnan ([mirzaatifadnan@gmail.com](mailto:mirzaatifadnan@gmail.com))

20

21

22

23

24

25

26

27

28

29

30

31

1 **ABSTRACT:**

2 Hazara population across Durand- line has experienced extensive interaction with Central Asian  
3 and East Asian populations. Hazara individuals have typical Mongolian facial appearances and  
4 they called themselves descendants of Genghis Khan's army. The people who speak the Balochi  
5 language are called Baloch. Previously, a worldwide analysis of Y-chromosomal haplotype  
6 diversity for rapidly mutating (RM) Y-STRs and with PowerPlex Y23 System (Promega  
7 Corporation Madison, USA) kit was created with collaborative efforts, but Baloch and Hazara  
8 population from Pakistan and Hazara population from Afghanistan were missing. A limited data  
9 with limited number of markers and samples is available which poorly define these populations.  
10 So, in the current study, Yfiler Plus PCR Amplification Kit loci were examined in 260 unrelated  
11 Hazara individuals from Afghanistan, 153 Hazara individuals, and 111 Balochi individuals from  
12 Baluchistan Pakistan. For the Hazara population from Afghanistan and Pakistan overall, 380  
13 different haplotypes were observed on these 27 Y-STR loci, gene diversities ranged from  
14 0.51288 (DYS389I) to 0.9257 (DYF387S1) and haplotype diversity was 0.9992 +/- 0.0004. For  
15 the Baloch population, every individual was unique at 27 Y-STR loci, gene diversity ranged  
16 from 0.5718 (DYS460) to 0.9371(DYF387S1). Twelve haplotypes shared between 178  
17 individuals while only two haplotypes among these twelve were shared between 87 individuals  
18 in Hazara populations. Rst and Fst pairwise genetic distance analyses, multidimensional scaling  
19 (MDS) plot, Neighbor-joining (NJ) tree, linear discriminatory analysis (LDA), and  
20 median-joining network (MJNs) were performed, which shed light on the history of Hazara and  
21 Baloch populations. Interestingly null alleles were observed at DYS448 with specific mutation  
22 patterns in Hazara populations. The results of our study showed that the Yfiler Plus PCR  
23 Amplification Kit marker set provided substantially stronger discriminatory power in the Baloch  
24 population of Pakistan and the Hazara population across the Durand-line.

25  
26 **Keywords:** Hazara; Pakistan; Afganistan; Baloch; Population history; Forensic Genetics

27

28

29

30

31

32

33

34

35

## 1 INTRODUCTION

2 The variation pattern in Human DNA usually provides a balance between natural selection and  
3 neutral processes. Y chromosomal variant analysis for determining the patterns of present and  
4 past flow of genes between populations is very helpful<sup>1</sup>. Y-chromosome short tandem repeats  
5 (YSTRs) plays an important role in forensic molecular biology<sup>2-5</sup>. Usually, Y-STRs are used for  
6 (i) decidedly determine the male component of DNA mixtures under the presence of a high  
7 female DNA background as typically confronted with materials from sexual assault cases<sup>6</sup>, (ii) to  
8 test for paternal relationships between male individuals particularly in deficiency paternity cases  
9 with the mother not being available<sup>7</sup>, or (iii) for special cases in missing-person or (iv)  
10 disaster-victim identification involving males<sup>8</sup>, or (v) for evolutionary purposes because male  
11 family members share same haplotype distribution which may be different from individual to  
12 individual within a population group, or (vi) different geographic regions or in different ethnic  
13 groups. Normally, more paternal lineages can be differentiated with an increased number of  
14 Y-STRs<sup>9</sup>, such as the Powerplex Y Kit (Promega) containing 12 Y-STRs<sup>10</sup>, the AmpFISTR  
15 Y-filer PCR Amplification Kit (Life Technologies) (subsequently referred to as Y-filer)  
16 containing 17 Y-STRs<sup>11</sup> or Powerplex Y23 Kit (Promega) containing 23 Y-STRs<sup>12</sup>, relative to  
17 the initially proposed 9-loci haplotype<sup>13</sup>. So, Applied Biosystems have developed Yfiler Plus  
18 PCR Amplification Kit<sup>14</sup>. The Yfiler Plus kit provides enhanced discrimination power because it  
19 includes the Yfiler loci and 10 additional STRs in which 6 are rapidly mutating (RM) Y STRs.  
20 These rapidly mutating Y STRs showed a higher mutation rate of about a few mutations every  
21 100 generations per locus ( $\mu > 10^{-2}$ ) compared with all other commonly used Y-STRs. Molecular  
22 biological and cytogenetical studies give us an insight into the presence of many structural  
23 variants within the human Y chromosome, which might be deletions<sup>15-17</sup>, duplications<sup>18-20</sup>, and

1 inversions<sup>19-23</sup>. Null alleles or allele droop-out are well-established factors that can occur with  
2 any PCR-based STR typing system. The reason could be the primer binding site problem or  
3 deletions within the target region<sup>24,25</sup>. DYS448 lied in the proximal part of the azoospermia  
4 factor c (AZFc) region, which is considered important in spermatogenesis and made up of  
5 “ampliconic” repeats which act as substrates for nonallelic homologous recombination (NAHR).  
6 NAHR could delete larger blocks of the Y chromosome which included DYS448<sup>26</sup>. This null  
7 alleles or allelic drop-out phenomenon is more commonly observed in Central Asian and East  
8 Asian populations but in the Hazara population of Pakistan, its occurrence was >16%<sup>27</sup>.

9 Durand Line is a boundary established in the Hindu Kush around 1893 running through the tribal  
10 lands between Afghanistan and British India (modern-day Pakistan), marking their respective  
11 scopes of influence. The recognition of this line, which was named after Sir Mortimer Durand,  
12 has settled the Indo-Afghan frontier problem for the rest of the British period. Now, this is an  
13 established border between Afghanistan and Pakistan. The origin of the Hazara population is  
14 disputed. The Hazara could be of Turko-Mongol ancestry and theorized to be the descendants  
15 of an occupying army left in Afghanistan by Genghis Khan in thirteen hundred AD<sup>28</sup>. The  
16 Hazara population speaks Persian with some Mongolian words. The total population of Hazaras  
17 in the world is 4.5 million. Afghanistan is considered the mainland for the Hazara population (3  
18 million) and they are the third largest ethnic group (9%) after Tajiks (27%) and Pashtuns (42%)  
19<sup>29</sup>, while in Pakistan, Hazara is one of the distinct but small groups comprising 0.08% of the total  
20 population (<http://www.pbscensus.gov.pk>). The tribes who speak the Balochi language are called  
21 Baloch<sup>30</sup>. Balochi population is 3.6% of total Pakistani population  
22 (<http://www.pbscensus.gov.pk>). They are also found in the neighboring areas of Iran and  
23 Afghanistan. Perhaps, the origin of Baloch homeland lay on the Iranian plateau. The Baloch

1 were mentioned in Arabic chronicles of the 10th century. The Seljuq invasion of Kermān in the  
2 11th century started the eastward migration of the Balochi population<sup>30</sup>.

3 In this study, we have investigated the Baloch and Hazara population from Pakistan and the  
4 Hazara population from Afghanistan using 27 Y STRs to determine their genetic history and  
5 gene diversity. This data has defined the Hazara and Baloch populations better and are  
6 supplement to the Y STR haplotype reference database (YHRD).

## 7 **2. RESULTS AND DISCUSSIONS:**

### 8 ***2.1 Allelic frequencies and Forensic parameters***

9 We successfully obtained genotypes of 524 individuals in three ethnic groups (Balochi  
10 population, Hazara population from Afghanistan, and Pakistan) (**Supplementary Table 1**).

11 Allelic frequencies of Baloch ethnic group from Baluchistan, Pakistan, and Hazara ethnic groups  
12 from Pakistan and Afghanistan along with gene diversity values were shown in **Supplementary**  
13 **Table 2**.

14 DYF387S1 showed the highest gene diversity/heterozygosity in Baloch and both Hazara  
15 populations from Afghanistan and Pakistan with 0.9371, 0.9242, and 0.8792, respectively.

16 Overall DYS570 (0.8624) showed the highest or DYS437 (0.2383) showed the lowest gene  
17 diversity/heterozygosity for single Y STR markers. Within three populations, single Y-STR  
18 markers DYS570 (0.8624), DYS449 (0.8468), DYS627 (0.7949) showed the highest gene  
19 diversity/heterozygosities while DYS460 (0.5718), DYS391 (0.3916), and DYS437 (0.2383)  
20 showed the lowest gene diversity/heterozygosities in the Baloch and both the Hazara populations  
21 from Afghanistan and Pakistan, respectively. After pooling Hazara populations together  
22 DYF387S1, DYS437 showed the highest or lowest gene diversity/heterozygosities with 0.9257

1 and 0.4053 respectively. The observed numbers of alleles were 222, 240, and 188 for Baloch and  
2 both the Hazara populations from Afghanistan and Pakistan, respectively on 27 Y STRs.

3 Allelic frequencies ranged from 0.0090 to 0.6036 in the Baloch population, 0.0038 to 0.6654 in  
4 the Hazara population from Afghanistan, and 0.0065 to 0.8627 in the Pakistani Hazara  
5 population.

6 We evaluated forensic parameters at seven levels (**Table 2**), the minimal 9 Y-STRs loci (DYS19,  
7 DYS389I, DYS389II, DYS390, DYS391, DYS392, DYS393, and DYS385a/b), the extended 11  
8 Y-STRs loci (MHT+DYS438 and DYS439), PowerPlex Y12 STRs loci (extended 11 Y STRs +  
9 DYS437), Y-filer 17 STRs loci (PPY12+DYS448, DYS456, DYS458, DYS635, and  
10 Y\_GATA\_H4), Y21STRs loci(Y-filer + DYS481, DYS533, DYS570, and DYS576 ), Y27 Yfiler  
11 Plus loci (21 STRs + DYF387S1, DYS449, DYS460, DYS518, and DYS627), and 6 rapidly  
12 mutating Y STRs loci (DYS570, DYS576, DYF387S1, DYS449, DYS518, and DYS627) which  
13 are summarized in Table 2. The discrimination capacity (DC) ranged from 87.38% (the minimal  
14 9 Y-STRs loci) to 100% (Y27 Yfiler Plus loci) with random matching probability from 0.0162  
15 (MHT) to 0.009 (Y27 Yfiler Plus loci) and haplotype diversity (HD) ranged 0.9928 (the minimal  
16 9 Y-STRs loci) to 1.0 (Y27 Yfiler Plus loci) in the Baloch population of Pakistan. The  
17 discrimination capacity (DC) ranged from 47.06% (the minimal 9 Y-STRs loci) to 99.35% (Y27  
18 Yfiler Plus loci) with random matching probability from 0.0745 (MHT) to 0.0066 (Y27 Yfiler  
19 Plus loci) and haplotype diversity (HD) ranged from 0.9316 (the minimal 9 Y-STRs loci) to  
20 0.9999 (Y27 Yfiler Plus loci) in Pakistani Hazara population while DC ranged 41.15% (the

1 minimal 9 Y-STRs loci) to 88.46% (Y27 Yfiler Plus loci) with random matching probability  
2 from 0.0329 (MHT) to 0.0057 (Y27 Yfiler Plus loci) and HD ranged from 0.9708 (the minimal 9  
3 Y-STRs loci) to 0.9937 (Y27 Yfiler Plus loci) for Hazara population from Afghanistan. Pooling  
4 both populations together DC ranged 40.19% (the minimal 9 Y-STRs loci) to 92% (Y27 Yfiler  
5 Plus loci) with random matching probability from 0.0334 (MHT) to 0.0032 (Y27 Yfiler Plus loci)  
6 and HD ranged from 0.9689 (the minimal 9 Y-STRs loci) to 0.9992 (Y27 Yfiler Plus loci).  
7 Interestingly six rapidly mutating Y STRs which are included in Yfiler plus kit detects high  
8 haplotype diversity (Table 2). We have observed 101 (90.99%) different haplotypes out of 111,  
9 among them, 95 (85.58%) were unique in the Baloch population and we have observed 139  
10 (90.84%) different haplotypes out of 153, among them 131 (85.62%) were unique in Pakistani  
11 Hazara population while in Afghani Hazara population observed haplotypes were 188 (72.30%)  
12 out of 260, among them 152(58.46%) were unique. These six STRs (RM Y STRs) showed the  
13 almost same diversity, shown by PPY 23 loci. The above results are showing that Yfiler plus kit  
14 loci showed strong discrimination capacity, haplotype diversity, and random mating probabilities  
15 which provide utility for forensic identification and paternity testing in three ethnic groups  
16 (Baloch and Hazara from Pakistan while Hazara from Afghanistan).

## 17 *2.2Phylogenetic analyses and Population comparisons*

18

1 Since the anthropological or ethno-historical relationships between studied populations and  
2 reference populations which are included for analysis were already known, so we used two  
3 different methods on the basis of their similarity with *a priori* expectations. *Fst* is a standardized  
4 variance of haplotype frequency and assumes genetic drift as being the agent that differentiates  
5 populations. *Rst* is a standardized variance of haplotype size and takes into account both drift and  
6 mutation as causes of population differentiation, assuming a stepwise model in which each  
7 mutation creates a new allele either by adding or deleting a single repeat unit. To assess the  
8 relationship between these three populations (Baloch, Hazara from Pakistan and Afghani  
9 Hazaras), and the other relevant populations which are summarized in **Table 1**, pair-wise genetic  
10 distances (*Rst* and *Fst* ) and their corresponding p-values were calculated and were shown in  
11 **Supplementary Table 3**. These *Rst* and *Fst* values were visualized using hierarchical clustering  
12 heat-map (**Supplementary Figure 1 a & b**). Dendrograms give us a clear picture about the  
13 organization of the data which can be compared with NJ trees or MDS plots. The utilization of  
14 mean-linkage dendrograms to Y STR data gives us a consistent basis of comparison. Heat-map  
15 matrix based on *Rst* values showed that Hazara from Pakistan were clustered more closely to  
16 Central and East Asian (i.e. Kazakh and Mongols) populations while the Baloch population was  
17 clustered with other Pakistani (i.e. Pathan and Sindhi) populations and Hazara from Afghanistan  
18 were clustered with local Afghan populations. On another hand, the heat-map matrix based on  
19 *Fst* values showed that the Hazara population from Pakistan was tightly clustered with local (i.e.  
20 Baloch, Arain, and Pathans) populations while the Hazara population from Afghanistan was  
21 clustered with Afghanistan Pathan and Northern Talysh population. The observed pattern of  
22 inter-population diversity from *Rst* was in support of anthropological knowledge, while that  
23 based on *Fst* revealed unexpected and unconvincing population affinities. These results are



1 consistent with our previous study results<sup>31</sup>. The pairwise *Rst* genetic distances values between  
2 Baloch and other relevant populations ranged from -0.0402 to 0.1417. According to *Rst* values,  
3 the Baloch population of Pakistan showed the closest genetic distance to Turks (-0.0402) from  
4 Ardabil, Iran while Kazakh (0.1417) from Gansu, China showed the greatest genetic distance.  
5 For the Afghan Hazara population, the Afghan population (0.0009) from Afghanistan showed the  
6 closest genetic distance and for the Pakistani Hazara group, the Afghan population (0.0381) from  
7 Afghanistan showed the closest genetic distance To investigate the paternal relationship among  
8 these three and other reference populations, we have generated the MDS plot (figure 1) based on  
9 pairwise *Rst* matrix from supplementary table 3. In the MDS plot, we have seen that the Hazara  
10 population from Afghanistan is located closer to the Afghan population from Afghanistan and  
11 the Pathan population from northern Afghanistan which is similar to the results of another study  
12<sup>32</sup>, while Pakistani Hazara lined closer to Kazakh and Mongolian population which is similar to  
13 our previous study's results<sup>27,33</sup>.

14 According to *Fst* values, the Afghan Hazara population is closest to the Afghan population (0.0053)  
15 followed by the Hazara population from Balochistan, Pakistan (0.0057), and Iranian population  
16 from Mashhad, Iran (0.0077). Evolutionary relationships between the Baloch and Hazara  
17 population of Pakistan, the Hazara population from Afghanistan, and other reference populations  
18 were inferred from the Neighbor-joining tree based on *Fst* values (**Figure 2**). In  
19 neighbor-joining trees, an admixed population will always lie on the path between the source  
20 populations<sup>34</sup>. In total, we have observed 14 clusters for 62 populations in NJ-tree and the Baloch  
21 population placed itself in the second cluster along with West-south Asian populations. Hazara  
22 populations from Pakistan and Afghanistan came to the fourth cluster along with the Afghani and  
23 Iranian populations. The pattern of inter-population diversity based on *Rst* was consistent with

1 ethnohistorical and anthropological knowledge, while that based on *Fst* shown surprising and  
2 unaccepted population affinities.

### 3 **2.3 Inference of ancestry based on Y STRs**

4 The Y haplogroups were predicted using the online Y-haplogroup predictor software  
5 (<http://www.nevgen.org/>). C2 (previously known as C3-Star cluster) was the most frequent  
6 haplogroup in Pakistani and Afghan Hazaras.

7 The median-joining network of haplotypes (**Figure 3**) showed a bulky central star-like cluster  
8 which represents predicated haplogroup M217 and another big cluster representing haplogroup  
9 M420 and comprises many of the identical or highly similar haplotypes. These types of features  
10 are usually inferred as past male-lineage expansions<sup>35</sup>. Star-like features of haplotypes  
11 comprising haplogroup M217 (C2) have been reported previously in Hazara, Mongol, and  
12 Kazakh populations<sup>27,33,36</sup>. An explanation about its origin in Mongolia was about ~1,000 years  
13 ago<sup>36</sup>. The frequency of R haplogroup in the Baloch population is 36.03%, 22.22% in Pakistani  
14 Hazara, and 21.15% in Afghani Hazara. This haplogroup originated in north Asia about 27,000  
15 years ago (<http://isogg.org/tree/index.html>). R is one of the most frequent haplogroups in Europe,  
16 with its branches reaching 80% of the population in some regions. One branch is believed to  
17 have originated in the Kurgan culture, known to be the first speakers of the Indo-European  
18 languages and responsible for the domestication of the horse<sup>37</sup>. From somewhere in Central Asia,  
19 some descendants of the man carrying the M207 mutation on the Y chromosome headed south to  
20 arrive in India about 10,000 years ago<sup>38</sup>. This is one of the frequent haplogroups in Pakistan and  
21 North India. In the Baloch population frequency of haplogroup L1 is 22.5% and 1.53% in  
22 Afghani Hazara. In sub-continental populations its frequency is about 7–15%<sup>39,40</sup>. Genetic  
23 studies suggest that this may be one of the original haplogroups of the creators of Indus Valley

1 Civilization<sup>41,42</sup>. The frequency of L1 is about 28% in Pakistan and Baluchistan, from where the  
2 agricultural creators of this civilization emerged<sup>43</sup>. The origins of this haplogroup can be traced  
3 to the rugged and mountainous Pamir Knot region in Tajikistan<sup>38</sup>.

4 In an earlier study<sup>36</sup>, the star-cluster (C3) profile for  
5 DYS389I-DYS389b-DYS390-DYS391-DYS392-DYS393-DYS388-DYS425-DYS426-DYS434  
6 -DYS435-DYS436-DYS437-DYS438-DYS439 was  
7 10-16-25-10-11-13-14-12-11-11-11-12-8-10-10. In present study mostly occurring haplotype for  
8 loci  
9 DYS19-DYS389I-DYS389II-DYS390-DYS391-DYS392-DYS393-DYS437-DYS438-DYS439  
10 was 15-13-29-24-10-11-13-14-11-12 which repeated itself in 43 individuals while  
11 14-13-29-24-8-11-13-14-11-11 repeated in 9 individuals and 15-13-29-24-11-11-13-14-11-12  
12 repeated in 8 individuals in Pakistani Hazara population while in Afghani Hazara  
13 16-13-29-25-10-11-13-14-10-10, 15-13-29-24-10-11-13-14-11-12,  
14 14-12-28-23-10-11-12-15-9-11, 14-13-29-24-11-13-12-15-12-12 and  
15 15-14-32-25-11-11-13-14-9-10 haplotypes were repeated in 30, 17, 15, 12 and 11 individuals,  
16 respectively. The occurrence of these haplotypes were previously observed in Mongols and  
17 Kazakhs<sup>35</sup>. Allelic ranges of Kazak<sup>35</sup> population from Kazakhstan Central Asia were similar  
18 while Mongol population from Inner Mongolia were almost similar on above mentioned 10 Y  
19 STRs. In our earlier study<sup>31</sup>, results showed that Hazaras have a close genetic affinity with  
20 Turkic-speaking (Kazakh, Kyrgyz and Uyghur) and Mongolian people. Admixture and outgroup  
21 findings further clarified that Hazara have 57.8% gene pool from Mongolians.

22 Here we also speculated a hypothesis that is based on hearsay that Hazaras living in Pakistan are  
23 more conserved and they only mate with the Hazaras while across the Durand line the Hazaras

1 mate with other ethnic groups in Afghanistan. Results of gene diversity/heterozygosity and  
2 F-statistics tests are also supporting this hypothesis. According to results, all loci showed more  
3 diversity in the Hazara population from Afghanistan when compared with the Hazara population  
4 from Pakistan (**Figure 4**). F-statistics test within Hazara populations showed variations at four  
5 loci only (DYS393- 0.05002, DYS449- 0.01694, DYS387S1- 0.00662 and DYS385a/b- 0.00004)  
6 (**Supplementary Table 4**). These variations may be the sampling effect, population diversity, or  
7 maybe geographical boundaries. LDA is a transformation technique which is commonly used to  
8 understand genome diversity and was performed on the Hazara population, Central Asian, South  
9 Asian including the Baloch population, East Asian, and Russian population samples to explore  
10 their genetic homology. **Figure 5** shows all individual samples plotted on the two LDA factors  
11 (F1 and F2). LDA Plot showed the association of the Hazara population with East and Central  
12 Asian populations.

#### 13 **2.4 Physical characterization of DYS448 deletions**

14 By using the Yfiler plus kit, we have observed the null allele at DYS448 in 29 individuals in the  
15 Hazara population from Afghanistan (**Figure 6**). Certain factors can cause the phenomena of null  
16 alleles and these are deletions within the target region, primer binding sites problem that  
17 destabilize hybridization of at least one of the primers flanking the target region <sup>44-47</sup>. This  
18 phenomenon was previously reported, in which other commercial kits were used <sup>48-53</sup>. The  
19 current population study represents the highest frequencies of the null allele at DYS448 when  
20 compared with the previously reported population to date (**Table 3**). The core repeat motif of the  
21 DYS448 locus is the hexanucleotide repeat AGAGAT<sup>54</sup>. DYS448 has two polymorphic domains  
22 separated by an invariant 42-bp region.

1 We have observed 29 null alleles among these, long deletions were covering at a minimum the  
2 N42 region and the core AGAGAT repeats downstream, and small deletions encompassing  
3 upstream repeats as well (all alignments were based on allele 20). Observed null alleles at locus  
4 DYS448 in 29 individuals from the Hazara population of Afghanistan, which were later  
5 confirmed with the GoldenEye Y20 System kit were successfully amplified using self-designed  
6 primers and sequenced (**Supplementary Table 5**) which were submitted to genbank under  
7 accession numbers MN623385 to MN623413. Overall we have observed 55 null alleles at  
8 DYS448 in the Hazara population from Pakistan and Afghanistan. Interestingly, all individuals  
9 (55) who showed deletion at DYS448 belongs to haplogroup C2 which is most frequent  
10 haplogroup in Mongol and Kazakh populations. This high frequency of allele drop-out / mutation  
11 is DYS448 in Hazara population from Pakistan and Afghanistan strongly support the evidence  
12 that they have Kazakh and Mongol origin. Whole genome or Y Chromosomal sequencing is  
13 required to get more insight of this polymorphism. The frequency of the null allele at DYS448 is  
14 more frequent in Asia more specifically in East and Central Asia when compared to the rest of  
15 the world<sup>26,49</sup>. The commercial companies should pay special attention while designing DYS448  
16 primers.

### 17 ***2.5 Concluding Remarks***

18 Finally, our study demonstrates that the Yfiler plus kit detects high haplotype diversity in Baloch  
19 population from Pakistan and Hazara populations from across the Durand line (Pakistan and  
20 Afghanistan) of which two (Baloch and Afghani Hazara) were not previously studied at Yfiler  
21 plus STR loci, which in general makes it suitable for forensic casework in these groups. The  
22 recent inclusion of these data in the YHRD allows widespread use for forensic and other  
23 purposes.

## 1 **3. MATERIALS AND METHODS**

### 2 *3.1 Samples*

3 A total of 524 blood samples were collected, in which 111 Balochi individuals from Baluchistan  
4 Pakistan, 153 from Hazara Town Quetta, Baluchistan Pakistan (Participants were part of an  
5 earlier study<sup>27</sup> and were agreed to the secondary use of their DNA samples), and 260 from  
6 Bamyan, Afghanistan. All participants who were included in this study were unrelated  
7 individuals of at least three generations. All participants gave their informed consent either orally  
8 and with thumbprint (in case they could not write) or in writing after the study aims and  
9 procedures were carefully explained to them. This collaborative study was approved by the  
10 ethical review boards of China Medical University, Shenyang, Liaoning Province, People's  
11 Republic of China (2019/067-P), University of Health Sciences Lahore Pakistan  
12 (2017-CMU-1/14), and Ministry of Public Health, Forensic Medicine Directorate, Kabul,  
13 Afghanistan (FC-2017-02). All the experimental procedures were performed in accordance  
14 with the standards of the Declaration of Helsinki.

### 15 *3.2. DNA extraction*

16  
17 Axygen AxyPrep Blood Genomic DNA Miniprep Kit was used to extract genomic DNA  
18 according to the manufacturer's protocol (Axygen Biosciences; CA, USA).

### 19 *3.3 PCR Amplification*

20 DNA was amplified using Yfiler Plus PCR Amplification Kit (Thermo Fisher Scientific) PCR  
21 amplification was carried out using the Applied Biosystems GeneAmp PCR System 9700  
22 thermal cyclers. PCR amplifications were performed as recommended by the manufacturer,  
23 although using half of the recommended reaction volume (12.5 µl).

1    *3.4. 27Y-STRs genotyping*

2    After successful PCR amplification, The PCR products were analyzed by using an 8 capillary  
3    ABI 3500 DNA Genetic Analyzer with POP-4 polymer (Life Technologies) according to the  
4    manufacturer's protocol. GeneMapper Software version 4.0 (Life Technologies) was used for the  
5    genotype assignment. DNA typing was performed according to the manufacturer's protocol by  
6    using the locus panel and allele bins supplied by the manufacturer and allele designations  
7    corresponding with the allelic ladder supplied by the manufacturer. Genotype nomenclature was  
8    based on the recommendations of the International Society for Forensic Genetics <sup>55</sup>.

9    *3.5. Confirmation of Null DYS 448*

10    For the confirmation of samples that showed no allele call at DYS448, they were re-amplified by  
11    using the Goldeneye 20Y amplification kit (Goldeneye Technology Ltd.). After confirmed with  
12    two different kits (Yfiler Plus and GoldenEye 20Y), these samples were amplified and sequenced  
13    as described elsewhere <sup>27</sup>.

14    *3.6. Quality control*

15    Our laboratory has participated and passed the YHRD quality assurance exercise 2015.  
16    Haplotype data were already made accessible via the Y-chromosome Haplotype Reference  
17    Database (YHRD) under accession number YA004595 (Balochi) in 61st release on dated 2019  
18    June 24, YA004312-2 (Hazara Pakistan) and YA004503 (Hazara Afghanistan) in 59th release on  
19    dated 2018 November 01. 29 sequenced samples at null allele call at DYS448 were also  
20    submitted to genbank under accession numbers MN623385 to MN623413 on dated 2019 october  
21    28.

22    *3.7. Statistical analysis*

1 Allelic and haplotype frequencies were computed by direct counting method and haplotype  
2 diversity (HD) was calculated according to:

$$HD = \frac{n}{n-1} \left( 1 - \sum_i p_i^2 \right)$$

3 where  $n$  is the male population size and  $p_i$  is the frequency of  $i$ th haplotype. Discrimination  
4 capacity (DC) was calculated as the ratio of unique haplotypes in the samples. Match  
5 probabilities (MP) were calculated as  $\sum P_i^2$ , where  $P_i$  is the frequency of the  $i$ -th haplotype.  
6 Genetic distances were evaluated using the  $R_{st}$ <sup>56</sup> and  $F_{st}$ <sup>57-59</sup> statistic, between reference  
7 populations and currently studied populations on overlapping STRs (DYS19, DYS389I,  
8 DYS389II, DYS390, DYS391, DYS392, DYS393, DYS437, DYS438, DYS439, DYS448,  
9 DYS456, DYS458, DYS635, and Y\_GATA\_H4) were calculated by using Arlequin Software  
10 v3.5<sup>60</sup>. We calculated both  $R_{st}$  and  $F_{st}$  values because in the generalized stepwise mutation  
11 model,  $R_{st}$  offers relatively unbiased evaluations of migration rates and times of population  
12 divergence while on other hand  $F_{st}$  tends to show too much population similarity, predominantly  
13 when migration rates are low or divergence times are long<sup>56</sup>. Reduced dimensionality spatial  
14 representation of the populations was performed based on  $R_{st}$  values using multi-dimensional  
15 scaling (MDS) with IBM SPSS Statistics for Windows, Version 23.0 (IBM Corp., Armonk, NY,  
16 USA). Heatmaps were generated using  $R_{st}$  and  $F_{st}$  values were generated using R program  
17 V3.4.1 platform with the help of a ggplot2 module.

### 18 *Phylogenetic analysis:*

19

20 A neighbor-joining phylogenetic tree was constructed for the Hazara and the reference  
21 populations based on a distance matrix of  $F_{st}$  using the Mega7 software<sup>61</sup>. We also predicted  
22 Y-SNP haplogroups in the samples from Y STR haplotypes (Yfiler STRs) using the Y-DNA



1 Haplogroup Predictor NEVGEN (<http://www.nevgen.org>). We have used FTDNA order for 17 Y  
2 STRs (Yfiler loci). The microvariant alleles were truncated to the next lowest integer value since  
3 values in the database were treated similarly. Any haplotypes which have null alleles or  
4 duplication variants in the Baloch or Hazara population from Pakistan or Afghanistan were  
5 excluded from the analysis. The results of NEVGEN were cross checked with Athey's  
6 Haplogroup Predictor (<http://www.hprg.com/hapest5/index.html>).

### 8 *Linear discriminant analysis*

9 R program V3.4.1 platform with the help of a ggplot2 module was used to perform linear  
10 discriminant analysis (LDA) for Hazara (Pakistan), Hazara (Afghanistan), Central Asia, East  
11 Asia, the Middle East, and Southwest Asian (Baloch) samples<sup>62</sup> on overlapping (DYS19,  
12 DYS389I, DYS389II, DYS390, DYS391, DYS392, DYS393, DYS437, DYS438, DYS439,  
13 DYS448, DYS456, DYS458, DYS635, and Y\_GATA\_H4) STRs. The multi-copy marker like  
14 (DYS385ab) and haplotypes that have null alleles or duplication variants in the Baloch or Hazara  
15 population or any of the reference populations were excluded from the analysis. For DYS389I  
16 and DYS389II, we have subtracted DYS389I from DYS389II and used DYS389II-I for analysis.

### 18 *The median-joining network*

19  
20 To define the genetic relationships among Balochi and Hazara individuals for 20 Y STRs  
21 (DYS19, DYS389II-I, DYS390, DYS391, DYS392, DYS393, DYS437, DYS438, DYS448,  
22 DYS456, DYS458, DYS635, Y\_GATA\_H4, DYS549, DYS460, DYS481, DYS533, DYS570,  
23 DYS576, DYS627), we used the stepwise mutation model and Median Joining-Maximum

1 Parsimony algorithm<sup>63</sup> by using the program Network 5 as described at the Fluxus Engineering  
2 website (<http://www.fluxus-engineering.com>), and the weighting criteria for Y-STRs following  
3<sup>27</sup>. Any haplotypes which have null alleles or duplication variants in the Baloch or Hazara  
4 population from Pakistan or Afghanistan were excluded from the analysis.

## 5 **COMPETING FINANCIAL INTERESTS**

6 None.

## 7 **AUTHOR CONTRIBUTION**

8 J.L. and A.A. designed this study. A.A., A.R., and S.N. and M.R., collected the samples. A.A.  
9 experimented and wrote the manuscript. A.A., J.L., A.R., S.N., R.A., S.W., and C.W., analyzed  
10 the results. A.A., and J.L., modified the manuscript. All authors reviewed the manuscript.

11

## 12 **COMPLIANCE WITH ETHICAL STANDARDS**

13 The study was approved (2019/067-P) by the ethical review board of China Medical University,  
14 Shenyang, Liaoning Province, People's Republic of China, and in accordance with the standards  
15 of the Declaration of Helsinki. All participants who were included in this study were unrelated  
16 individuals of at least three generations. All participants gave their informed consent either orally  
17 and with thumbprint (in case they could not write) or in writing after the study aims and  
18 procedures were carefully explained to them.

19

## 20 **ACKNOWLEDGMENTS**

21 We thank all volunteers who provided material and data for this project, especially Guanglin He  
22 and Abul-Hasan Fawad. This study was financially supported by the China Medical University  
23 postdoctoral research grant (100/1210619014).

24

25

26

27

28

29

30

31

32

1 **Legends of figures and tables:**

2 **Figure 1:** Two-dimensional plot from multi-dimensional scaling analysis of  $R_{st}$ -values based on  
3 Yfiler haplotypes for the Baloch population of Pakistan and Hazara populations across the  
4 Durand line with reference populations.

5 **Figure 2:** Neighbor-joining tree based on the  $F_{st}$  values between the Baloch population of  
6 Pakistan and Hazara populations across the Durand line with reference populations.

7 **Figure 3:** The median-joining network of the Baloch population of Pakistan and Hazara  
8 populations across the Durand line based on 20 Y STRs.

9 **Figure 4:** Heterozygosity scattered plot for three populations

10 **Figure 5:** LDA Analysis between the Baloch population of Pakistan and Hazara populations  
11 across the Durand line, Central Asia, South Asia, Russia, and East Asian populations.

12 **Figure 6:** Electropherogram of an individual showing null type at DYS448.

13 **Table 1:** Reference Populations from Central, Eastern and South Asia populations selected as  
14 reference populations used in LDA, NJ tree and multidimensional scaling (MDS) analysis.

15 **Table 2:** Forensic parameters on 7 different levels in three ethnic groups

16 **Table 3:** Frequencies of the null allele at DYS448 in various ethnic groups across continents

17 **Electronic Supplementary Materials (ESM):**

18 **Supplementary Figure 1:** Heatmap generated using  $R_{st}$  and  $F_{st}$  values.

19 **Supplementary Table 1:** Raw genotypic data of 3 ethnic groups typed with Yfiler plus

20 **Supplementary Table 2:** Allele Frequencies and Forensic Parameters 3 ethnic groups

21 **Supplementary Table 3:** Pairwise  $R_{st}$  and  $F_{st}$  values between 3 ethnic groups and other  
22 reference populations

23 **Supplementary Table 4:** F-statistics analysis between Hazara population from Pakistan and  
24 Afghanistan

25 **Supplementary Table 5:** Sequence in the relevant flanking and repeat region of the DYS448  
26 locus for null alleles.

27

28

## 1 **References:**

- 2 1. Oppenheimer, S. Out-of-Africa, the peopling of continents and islands: tracing uniparental gene  
3 trees across the map. *Philosophical Transactions of the Royal Society B: Biological Sciences* **367**,  
4 770–784 (2012).
- 5 2. Adnan, A., Ralf, A., Rakha, A., Kousouri, N. & Kayser, M. Improving empirical evidence on  
6 differentiating closely related men with RM Y-STRs: A comprehensive pedigree study from Pakistan.  
7 *Forensic Sci Int Genet* **25**, 45–51 (2016).
- 8 3. Adnan, A. *et al.* Population data of 17 Y-STRs (Yfiler) from Punjabis and Kashmiris of Pakistan.  
9 *International Journal of Legal Medicine* (2017) doi:10.1007/s00414-017-1611-9.
- 10 4. Adnan, A., Rakha, A., Lao, O. & Kayser, M. Mutation analysis at 17 Y-STR loci (Yfiler) in father-son  
11 pairs of male pedigrees from Pakistan. *Forensic Science International: Genetics* (2018)  
12 doi:10.1016/j.fsigen.2018.07.001.
- 13 5. Ballantyne, K. N. *et al.* Toward male individualization with rapidly mutating y-chromosomal short  
14 tandem repeats. *Hum. Mutat.* **35**, 1021–1032 (2014).
- 15 6. Prinz, M., Boll, K., Baum, H. & Shaler, B. Multiplexing of Y chromosome specific STRs and  
16 performance for mixed samples. *Forensic Science International* **85**, 209–218 (1997).
- 17 7. Ballantyne, K. N. & Kayser, M. Additional Y-STRs in Forensics: Why, Which, and When. *Forensic Sci*  
18 *Rev* **24**, 63–78 (2012).
- 19 8. Calacal, G. C. *et al.* Identification of Exhumed Remains of Fire Tragedy Victims Using Conventional  
20 Methods and Autosomal/Y-Chromosomal Short Tandem Repeat DNA Profiling: *The American*  
21 *Journal of Forensic Medicine and Pathology* **26**, 285–291 (2005).
- 22 9. Vermeulen, M. *et al.* Improving global and regional resolution of male lineage differentiation by  
23 simple single-copy Y-chromosomal short tandem repeat polymorphisms. *Forensic Science*  
24 *International: Genetics* **3**, 205–213 (2009).

- 1 10. Krenke, B. E. *et al.* "Validation of a male-specific, 12-locus fluorescent short tandem repeat (STR)  
2 multiplex" [Forensic Sci. Int. 148 (1) (2005) 1–14]. *Forensic Science International* **151**, 111–124  
3 (2005).
- 4 11. Mulero, J. J. *et al.* Development and validation of the AmpFISTR Yfiler PCR amplification kit: a male  
5 specific, single amplification 17 Y-STR multiplex system. *J. Forensic Sci.* **51**, 64–75 (2006).
- 6 12. Thompson, J. M. *et al.* Developmental validation of the PowerPlex® Y23 System: A single multiplex  
7 Y-STR analysis system for casework and database samples. *Forensic Science International: Genetics*  
8 **7**, 240–250 (2013).
- 9 13. Kayser, M. *et al.* Evaluation of Y-chromosomal STRs: a multicenter study. *International Journal of*  
10 *Legal Medicine* **110**, 125–133 (1997).
- 11 14. Gopinath, S. *et al.* Developmental validation of the Yfiler® Plus PCR Amplification Kit: An enhanced  
12 Y-STR multiplex for casework and database applications. *Forensic Science International: Genetics*  
13 **24**, 164–175 (2016).
- 14 15. Jobling, M. A. *et al.* Recurrent duplication and deletion polymorphisms on the long arm of the Y  
15 chromosome in normal males. *Hum. Mol. Genet.* **5**, 1767–1775 (1996).
- 16 16. Jobling, M. A. *et al.* Structural variation on the short arm of the human Y chromosome: recurrent  
17 multigene deletions encompassing Amelogenin Y. *Human Molecular Genetics* **16**, 307–316 (2007).
- 18 17. Repping, S. *et al.* Polymorphism for a 1.6-Mb deletion of the human Y chromosome persists  
19 through balance between recurrent mutation and haploid selection. *Nature Genetics* **35**, 247–251  
20 (2003).
- 21 18. Bosch, E. & Jobling, M. A. Duplications of the AZFa region of the human Y chromosome are  
22 mediated by homologous recombination between HERVs and are compatible with male fertility.  
23 *Hum. Mol. Genet.* **12**, 341–347 (2003).

- 1 19. Repping, S. *et al.* High mutation rates have driven extensive structural polymorphism among  
2 human Y chromosomes. *Nature Genetics* **38**, 463–467 (2006).
- 3 20. Verma, R. S., Rodriguez, J. & Dosik, H. The clinical significance of pericentric inversion of the human  
4 Y chromosome: a rare ‘third’ type of heteromorphism. *J. Hered.* **73**, 236–238 (1982).
- 5 21. Affara, N. A. *et al.* Variable transfer of Y-specific sequences in XX males. *Nucleic Acids Res.* **14**,  
6 5375–5387 (1986).
- 7 22. Bernstein, R., Wade, A., Rosendorff, J., Wessels, A. & Jenkins, T. Inverted Y chromosome  
8 polymorphism in the Gujerati Muslim Indian population of South Africa. *Hum. Genet.* **74**, 223–229  
9 (1986).
- 10 23. Page, D. C. Sex reversal: deletion mapping the male-determining function of the human Y  
11 chromosome. *Cold Spring Harb. Symp. Quant. Biol.* **51 Pt 1**, 229–235 (1986).
- 12 24. Budowle, B. *et al.* Null allele sequence structure at the DYS448 locus and implications for profile  
13 interpretation. *Int. J. Legal Med.* **122**, 421–427 (2008).
- 14 25. Westen, A. A. *et al.* Analysis of 36 Y-STR marker units including a concordance study among 2085  
15 Dutch males. *Forensic Science International: Genetics* **14**, 174–181 (2015).
- 16 26. Balaesque, P. *et al.* Dynamic nature of the proximal AZFc region of the human Y chromosome:  
17 multiple independent deletion and duplication events revealed by microsatellite analysis. *Human*  
18 *Mutation* **29**, 1171–1180 (2008).
- 19 27. Adnan, A. *et al.* Genetic characterization of Y-chromosomal STRs in Hazara ethnic group of Pakistan  
20 and confirmation of DYS448 null allele. *International Journal of Legal Medicine* (2018)  
21 doi:10.1007/s00414-018-1962-x.
- 22 28. Siddique, A. *Afghanistan’s Ethnic Divides*. [www.cidobafpakproject.com](http://www.cidobafpakproject.com) (2012).
- 23 29. *Afghanistan: a country study*. (Claitor’s Pub. Division, c2001).

- 1 30. Dashti, N. *The Baloch and Balochistan: a historical account from the beginning to the fall of the*  
2 *Baloch state*. (Trafford, 2012).
- 3 31. He, G. *et al.* A comprehensive exploration of the genetic legacy and forensic features of  
4 Afghanistan and Pakistan Mongolian-descent Hazara. *Forensic Science International: Genetics* **42**,  
5 e1–e12 (2019).
- 6 32. Haber, M. *et al.* Afghanistan’s ethnic groups share a Y-chromosomal heritage structured by  
7 historical events. *PLoS ONE* **7**, e34288 (2012).
- 8 33. Adnan, A. *et al.* Phylogenetic relationship and genetic history of Central Asian Kazakhs inferred  
9 from Y-chromosome and autosomal variations. *Mol Genet Genomics* (2019)  
10 doi:10.1007/s00438-019-01617-0.
- 11 34. Kopelman, N. M., Stone, L., Gascuel, O. & Rosenberg, N. A. The behavior of admixed populations in  
12 neighbor-joining inference of population trees. *Pac Symp Biocomput* 273–284 (2013).
- 13 35. Tarlykov, P. V. *et al.* Mitochondrial and Y-chromosomal profile of the Kazakh population from East  
14 Kazakhstan. *Croat. Med. J.* **54**, 17–24 (2013).
- 15 36. Zerjal, T. *et al.* The Genetic Legacy of the Mongols. *The American Journal of Human Genetics* **72**,  
16 717–721 (2003).
- 17 37. Smolenyak, M. & Turner, A. *Trace your roots with DNA: using genetic tests to explore your family*  
18 *tree*. (Rodale; Distributed to the trade by Holtzbrinck Publishers, 2004).
- 19 38. Wells, S. *Deep ancestry: inside the genographic project*. (National Geographic, 2007).
- 20 39. Basu, A., Sarkar-Roy, N. & Majumder, P. P. Genomic reconstruction of the history of extant  
21 populations of India reveals five distinct ancestral components and a complex structure. *Proc Natl*  
22 *Acad Sci USA* **113**, 1594–1599 (2016).
- 23 40. Di Cristofaro, J. *et al.* Afghan Hindu Kush: Where Eurasian Sub-Continent Gene Flows Converge.  
24 *PLoS ONE* **8**, e76748 (2013).

- 1 41. Mcelreavey, K. & Quintana-Murci, L. A population genetics perspective of the Indus Valley through  
2 uniparentally-inherited markers. *Annals of Human Biology* **32**, 154–162 (2005).
- 3 42. Sengupta, S. *et al.* Polarity and Temporality of High-Resolution Y-Chromosome Distributions in  
4 India Identify Both Indigenous and Exogenous Expansions and Reveal Minor Genetic Influence of  
5 Central Asian Pastoralists. *The American Journal of Human Genetics* **78**, 202–221 (2006).
- 6 43. Qamar, R. *et al.* Y-Chromosomal DNA Variation in Pakistan. *The American Journal of Human*  
7 *Genetics* **70**, 1107–1124 (2002).
- 8 44. Chang, C.-W., Mulero, J. J., Budowle, B., Calandro, L. M. & Hennessy, L. K. Identification of a Novel  
9 Polymorphism in the X-Chromosome Region Homologous to the DYS456 Locus. *Journal of Forensic*  
10 *Sciences* **51**, 344–348 (2006).
- 11 45. Collins, F. S., Brooks, L. D. & Chakravarti, A. A DNA polymorphism discovery resource for research  
12 on human genetic variation. *Genome Res.* **8**, 1229–1231 (1998).
- 13 46. Fredman, D. HGVbase: a curated resource describing human DNA variation and phenotype  
14 relationships. *Nucleic Acids Research* **32**, 516D – 519 (2004).
- 15 47. NCBI Resource Coordinators *et al.* Database resources of the National Center for Biotechnology  
16 Information. *Nucleic Acids Research* **46**, D8–D13 (2018).
- 17 48. Chang, Y. M., Perumal, R., Keat, P. Y. & Kuehn, D. L. C. Haplotype diversity of 16 Y-chromosomal  
18 STRs in three main ethnic populations (Malays, Chinese and Indians) in Malaysia. *Forensic Sci. Int.*  
19 **167**, 70–76 (2007).
- 20 49. Park, M. J. *et al.* Characterization of Deletions in the DYS385 Flanking Region and Null Alleles  
21 Associated with AZFc Microdeletions in Koreans. *Journal of Forensic Sciences* **53**, 331–334 (2008).
- 22 50. Parkin, E. J. *et al.* Diversity of 26-locus Y-STR haplotypes in a Nepalese population sample: Isolation  
23 and drift in the Himalayas. *Forensic Science International* **166**, 176–181 (2007).



- 1 51. Mizuno, N. *et al.* 16 Y chromosomal STR haplotypes in Japanese. *Forensic Science International* **174**,
- 2 71–76 (2008).
- 3 52. Roewer, L. *et al.* Y-chromosomal STR haplotypes in Kalmyk population samples. *Forensic Science*
- 4 *International* **173**, 204–209 (2007).
- 5 53. Sánchez, C. *et al.* Haplotype frequencies of 16 Y-chromosome STR loci in the Barcelona
- 6 metropolitan area population using Y-Filer™ kit. *Forensic Science International* **172**, 211–217
- 7 (2007).
- 8 54. Redd, A. J. *et al.* Forensic value of 14 novel STRs on the human Y chromosome. *Forensic Sci. Int.*
- 9 **130**, 97–111 (2002).
- 10 55. Roewer, L. *et al.* DNA commission of the International Society of Forensic Genetics (ISFG):
- 11 Recommendations on the interpretation of Y-STR results in forensic analysis. *Forensic Science*
- 12 *International: Genetics* **48**, 102308 (2020).
- 13 56. Slatkin, M. A measure of population subdivision based on microsatellite allele frequencies.
- 14 *Genetics* **139**, 457–462 (1995).
- 15 57. Weir, B. S. & Cockerham, C. C. Estimating F-Statistics for the Analysis of Population Structure.
- 16 *Evolution* **38**, 1358 (1984).
- 17 58. Michalakis, Y. & Excoffier, L. A generic estimation of population subdivision using distances
- 18 between alleles with special reference for microsatellite loci. *Genetics* **142**, 1061–1064 (1996).
- 19 59. Reynolds, J., Weir, B. S. & Cockerham, C. C. Estimation of the coancestry coefficient: basis for a
- 20 short-term genetic distance. *Genetics* **105**, 767–779 (1983).
- 21 60. Excoffier, L. & Lischer, H. E. L. Arlequin suite ver 3.5: a new series of programs to perform
- 22 population genetics analyses under Linux and Windows. *Molecular Ecology Resources* **10**, 564–567
- 23 (2010).

- 1 61. Kumar, S., Stecher, G. & Tamura, K. MEGA7: Molecular Evolutionary Genetics Analysis Version 7.0  
2 for Bigger Datasets. *Molecular Biology and Evolution* **33**, 1870–1874 (2016).
- 3 62. R Core Team. *R: A language and environment for statistical computing*. (R Foundation for  
4 Statistical Computing, 2015).
- 5 63. Bandelt, H. J., Forster, P. & Rohl, A. Median-joining networks for inferring intraspecific phylogenies.  
6 *Molecular Biology and Evolution* **16**, 37–48 (1999).
- 7 64. Igençs, C. & Tillmar, A. O. Population genetics of 29 autosomal STRs and 17 Y-chromosomal STRs in  
8 a population sample from Afghanistan. *International Journal of Legal Medicine* **128**, 279–280  
9 (2014).
- 10 65. Achakzai, N. M. *et al.* Y-chromosomal STR analysis in the Pashtun population of Southern  
11 Afghanistan. *Forensic Sci Int Genet* **6**, e103-105 (2012).
- 12 66. Lacau, H. *et al.* Y-STR profiling in two Afghanistan populations. *Leg Med (Tokyo)* **13**, 103–108  
13 (2011).
- 14 67. Nothnagel, M. *et al.* Revisiting the male genetic landscape of China: a multi-center study of almost  
15 38,000 Y-STR haplotypes. *Human Genetics* **136**, 485–497 (2017).
- 16 68. Kwak, K. D. *et al.* Y-chromosomal STR haplotypes and their applications to forensic and population  
17 studies in east Asia. *International Journal of Legal Medicine* **119**, 195–201 (2005).
- 18 69. Zhang, D. *et al.* RETRACTED ARTICLE: Y Chromosomal STR haplotypes in Chinese Uyghur, Kazakh  
19 and Hui ethnic groups and genetic features of DYS448 null allele and DYS19 duplicated allele. *Int J*  
20 *Legal Med* (2019) doi:10.1007/s00414-019-02049-6.
- 21 70. Shan, W. *et al.* Genetic polymorphism of 17 Y chromosomal STRs in Kazakh and Uighur populations  
22 from Xinjiang, China. *Int J Legal Med* **128**, 743–744 (2014).

- 1 71. Wang, C. *et al.* Genetic polymorphisms of 27 Yfiler® Plus loci in the Daur and Mongolian ethnic  
2 minorities from Hulunbuir of Inner Mongolia Autonomous Region, China. *Forensic Science*  
3 *International: Genetics* **40**, e252–e255 (2019).
- 4 72. Fu, X. *et al.* Genetic polymorphisms of 26 Y-STR loci in the Mongolian minority from Horqin district,  
5 China. *International Journal of Legal Medicine* **130**, 941–946 (2016).
- 6 73. Ou, X. *et al.* Haplotype analysis of the polymorphic 40 Y-STR markers in Chinese populations.  
7 *Forensic Science International: Genetics* **19**, 255–262 (2015).
- 8 74. Zhu, B. *et al.* Y-STRs haplotypes of Chinese Mongol ethnic group using Y-PLEX™ 12. *Forensic*  
9 *Science International* **153**, 260–263 (2005).
- 10 75. Bian, Y. *et al.* Analysis of genetic admixture in Uyghur using the 26 Y-STR loci system. *Scientific*  
11 *Reports* **6**, (2016).
- 12 76. Roewer, L., Willuweit, S., Stoneking, M. & Nasidze, I. A Y-STR database of Iranian and Azerbaijani  
13 minority populations. *Forensic Sci Int Genet* **4**, e53-55 (2009).
- 14 77. Sayyari, M., Salehzadeh, A., Tabatabaiefar, M. A. & Abbasi, A. Profiling of 17 Y-STR loci in  
15 Mazandaran and Gilan provinces of Iran. *Turk J Med Sci* **49**, 1277–1286 (2019).
- 16 78. Sayyari, M., Salehzadeh, A., Tabatabaiefar, M. A. & Abbasi, A. Genetic polymorphisms of  
17 Y-chromosome short tandem repeats (Y-STRs) in a male population from Golestan province, Iran.  
18 *Mol Biol Res Commun* (2020) doi:10.22099/mbr.2020.35547.1462.
- 19 79. Nasidze, I., Schädlich, H. & Stoneking, M. Haplotypes from the Caucasus, Turkey and Iran for nine  
20 Y-STR loci. *Forensic Science International* **137**, 85–93 (2003).
- 21 80. Javed, F. *et al.* Male individualization using 12 rapidly mutating Y-STRs in Araein ethnic group and  
22 shared paternal lineage of Pakistani population. *Int. J. Legal Med.* **132**, 1621–1624 (2018).
- 23 81. Ullah, I. *et al.* High Y-chromosomal Differentiation Among Ethnic Groups of Dir and Swat Districts,  
24 Pakistan. *Ann. Hum. Genet.* **81**, 234–248 (2017).

- 1 82. Adnan, A. *et al.* Population data of 17 Y-STRs (Yfiler) from Punjabis and Kashmiris of Pakistan.  
2 *International Journal of Legal Medicine* (2017) doi:10.1007/s00414-017-1611-9.
- 3 83. Lee, E. Y. *et al.* Analysis of 22 Y chromosomal STR haplotypes and Y haplogroup distribution in  
4 Pathans of Pakistan. *Forensic Science International: Genetics* **11**, 111–116 (2014).
- 5 84. Adnan, A. *et al.* Genetic structure and forensic characteristics of Saraiki population from Southern  
6 Punjab, Pakistan, revealed by 20 Y-chromosomal STRs. *Int J Legal Med* **134**, 977–979 (2020).
- 7 85. Perveen, R., Shahid, A. A., Shafique, M., Shahzad, M. & Husnain, T. Genetic variations of 15  
8 autosomal and 17 Y-STR markers in Sindhi population of Pakistan. *International Journal of Legal*  
9 *Medicine* **131**, 1239–1240 (2017).
- 10 86. Zhabagin, M. *et al.* Development of the Kazakhstan Y-chromosome haplotype reference database:  
11 analysis of 27 Y-STR in Kazakh population. *Int J Legal Med* **133**, 1029–1032 (2019).
- 12 87. Aliferi, A. *et al.* UK and Irish Y-STR population data—A catalogue of variant alleles. *Forensic Science*  
13 *International: Genetics* **34**, e1–e6 (2018).
- 14 88. Ali, N., Coulson-Thomas, Y. M., Norton, A. L., Dixon, R. A. & Williams, D. R. Announcement of  
15 population data: genetic data for 17 Y-STR AmpF $\mathbb{I}$ STR $\mathbb{R}$  Yfiler $\mathbb{T}$ M markers from an immigrant  
16 Pakistani population in the UK (British Pakistanis). *Forensic Sci Int Genet* **7**, e40-42 (2013).
- 17 89. Mizuno, N. *et al.* 16 Y chromosomal STR haplotypes in Japanese. *Forensic Science International* **174**,  
18 71–76 (2008).
- 19 90. Gutiérrez-Alarcón, A. B., Moguel-Torres, M., León-Jiménez, A. K., Cuéllar-Nevárez, G. E. &  
20 Rangel-Villalobos, H. Allele and haplotype distribution for 16 Y-STRs (AmpFISTR $\mathbb{R}$  Y-filer $\mathbb{T}$ M kit) in the  
21 state of Chihuahua at North Center of Mexico. *Legal Medicine* **9**, 154–157 (2007).
- 22  
23  
24

- 1 **Table 1:** Reference Populations from Central, Eastern and South Asia populations selected as
- 2 reference populations used in LDA, NJ tree and multidimensional scaling (MDS) analysis.

| No | Population         | Haplotypes | Country                                               |
|----|--------------------|------------|-------------------------------------------------------|
| 1  | Afghan             | 152        | Afghanistan <sup>64</sup>                             |
| 2  | Pathan             | 125        | Afghanistan <sup>65</sup>                             |
| 3  | Pathan             | 44         | North Afghanistan <sup>66</sup>                       |
| 4  | Pathan             | 142        | South Afghanistan <sup>66</sup>                       |
| 5  | Farsi, Arab        | 35         | Ahvaz, Iran (accession no YA004581)                   |
| 6  | Farsi, Azerbaijani | 34         | Hamedan, Iran (accession no YA004582)                 |
| 7  | Han                | 934        | Beijing, China <sup>67,68</sup>                       |
| 8  | Kazakh             | 231        | Xinjiang, China <sup>69,70</sup>                      |
| 9  | Mongol             | 272        | Hulun Buir, China <sup>71</sup>                       |
| 10 | Mongol             | 454        | Inner Mongolia, China <sup>72-74</sup>                |
| 11 | Uighur             | 732        | Xinjiang, China <sup>75</sup>                         |
| 12 | Arab               | 33         | Ahvaz, Iran <sup>76</sup>                             |
| 13 | Azerbaijani        | 39         | Tabriz, Iran (accession no YA004586)                  |
| 14 | Azerbaijani        | 50         | Urmia, Iran (accession no YA004587)                   |
| 15 | Bakhtiari          | 45         | Izeh, Iran <sup>76</sup>                              |
| 16 | Baloch             | 19         | Balochistan, Iran (accession no YA003794)             |
| 17 | Baloch             | 59         | Zahedan, Iran (accession no YA004238)                 |
| 18 | Farsi              | 286        | Tehran, Iran (accession no YA004580)                  |
| 19 | Gilak              | 98         | Gilan, Iran <sup>77</sup>                             |
| 20 | Gilaki             | 42         | Rasht, Iran <sup>76</sup>                             |
| 21 | Iranian            | 27         | Birjand, Iran (accession no YA003902)                 |
| 22 | Iranian            | 152        | Central Iran, Iran (accession no YA003782)            |
| 23 | Iranian            | 106        | Fars, Iran (accession no YA004229)                    |
| 24 | Iranian            | 106        | Golestan, Iran <sup>78</sup>                          |
| 25 | Iranian            | 94         | Iran (accession no YA004237)                          |
| 26 | Iranian            | 161        | Isfahan, Iran <sup>79</sup>                           |
| 27 | Iranian            | 127        | Mashhad, Iran (accession no YA003903)                 |
| 28 | Kurd               | 51         | Iran (accession no YA004244)                          |
| 29 | Kurdish            | 77         | Kermanshah, Iran (accession no YA004584)              |
| 30 | Kurdish            | 73         | Kurdistan, Iran (accession nos YA003795 and YA004585) |
| 31 | Lor                | 37         | Lorestan, Iran (accession nos YA003796 and YA004243)  |
| 32 | Lurs               | 9          | Kohgiluyeh-Buyer Ahmad, Iran (accession no YA003797)  |
| 33 | Mazandarani        | 44         | Sari, Iran <sup>76</sup>                              |

|                         |                      |             |                                                      |
|-------------------------|----------------------|-------------|------------------------------------------------------|
| 34                      | Mazani               | 126         | Mazan daran, Iran <sup>77</sup>                      |
| 35                      | Parsee               | 17          | Fars, Iran (accession no YA003798)                   |
| 36                      | Qashqae              | 15          | Fars, Iran (accession no YA003799)                   |
| 37                      | Sistani              | 64          | Zabol, Iran (accession no YA004241)                  |
| 38                      | Talysh               | 15          | Masal, IranSouth <sup>76</sup>                       |
| 39                      | Turk                 | 11          | Ardabil, Iran (accession no YA004240)                |
| 40                      | Zoroastrian          | 6           | Yazd, Iran (accession no YA003800)                   |
| 41                      | Luri                 | 60          | Ilam, Iran Kurdish (accession no YA004583)           |
| 42                      | Arain                | 85          | Punjab, Pakistan <sup>80</sup>                       |
| 43                      | Baloch               | 98          | Balochistan, Pakistan (accession no YA004595)        |
| 44                      | Gujjar               | 20          | Swat and Dir District, Pakistan <sup>81</sup>        |
| 45                      | Hazara               | 160         | Balochistan, Pakistan <sup>27</sup>                  |
| 46                      | Kashmiri             | 175         | Azad Kashmir, Pakistan <sup>82</sup>                 |
| 47                      | Kohistani            | 20          | Swat and Dir District, Pakistan <sup>81</sup>        |
| 48                      | Pathan               | 269         | Pakistan <sup>83</sup>                               |
| 49                      | Punjabi              | 383         | Punjab, Pakistan <sup>3</sup>                        |
| 50                      | Roma                 | 278         | Punjab, Pakistan (accession no YA004554)             |
| 51                      | Saraiki              | 51          | Southern Punjab, Pakistan (accession no YA004225)    |
| 52                      | Saraki               | 148         | Punjab, Pakistan <sup>84</sup>                       |
| 53                      | Sindhi               | 98          | Sindh, Pakistan <sup>85</sup>                        |
| 54                      | Yousafzai Pathan     | 71          | KhyberPakhtunkhwa, Pakistan (accession no YA003748)  |
| 55                      | Tharklani, Pashtun   | 20          | Swat and Dir District, Pakistan <sup>81</sup>        |
| 56                      | Uthmankheil, Pashtun | 20          | Swat and Dir District, Pakistan <sup>81</sup>        |
| 57                      | Yousafzai, Pashtun   | 20          | Swat and Dir District, Pakistan <sup>81</sup>        |
| 58                      | Urdu, Punjabi        | 241         | Punjab, Pakistan (accession no YA004381)             |
| 59                      | Kazakh               | 305         | Kazakhstan <sup>86</sup>                             |
| 60                      | Kazakh               | 67          | East Kazakhstan, Kazakhstan (accession no YA003700)  |
| 61                      | Kazakh               | 99          | South Kazakhstan, Kazakhstan (accession no YA003729) |
| 62                      | Southwest Asian      | 493         | United Kingdom <sup>87</sup>                         |
| 63                      | British Pakistani    | 132         | United Kingdom <sup>88</sup>                         |
| <b>Total haplotypes</b> |                      | <b>8457</b> |                                                      |

1

2

3

1 **Table 2:** Forensic parameters on 7 different levels in three ethnic groups

| <b>Hazara Pakistan</b>    | <b>MHT 9 Y-STRs</b> | <b>EHT 11 Y-STRs</b> | <b>PPY-12 Y-STRs</b> | <b>Yfiler 17 Y-STRs</b> | <b>PPY23 21 Y-STRs</b> | <b>Yfiler plus 27 Y-STRs</b> | <b>6 RM Y STRs</b> |
|---------------------------|---------------------|----------------------|----------------------|-------------------------|------------------------|------------------------------|--------------------|
| <b>No of Samples</b>      | <b>153</b>          | <b>153</b>           | <b>153</b>           | <b>153</b>              | <b>153</b>             | <b>153</b>                   | <b>153</b>         |
| RMP                       | 0.0745              | 0.0577               | 0.0577               | 0.0123                  | 0.0084                 | 0.0066                       | 0.0091             |
| HD                        | 0.9316              | 0.9485               | 0.9485               | 0.9942                  | 0.9981                 | 0.9999                       | 0.9974             |
| No of haplotypes          | 72                  | 81                   | 81                   | 117                     | 140                    | 152                          | 139                |
| NUH                       | 54                  | 63                   | 63                   | 97                      | 132                    | 151                          | 131                |
| DC                        | 0.4705              | 0.5294               | 0.5294               | 0.7647                  | 0.9150                 | 0.9934                       | 0.9084             |
| % of Unique Haplotypes    | 0.3529              | 0.4176               | 0.4176               | 0.6339                  | 0.8627                 | 0.9869                       | 0.8562             |
| <b>Hazara Afghanistan</b> |                     |                      |                      |                         |                        |                              |                    |
| <b>No of Samples</b>      | <b>260</b>          | <b>260</b>           | <b>260</b>           | <b>260</b>              | <b>260</b>             | <b>260</b>                   | <b>260</b>         |
| RMP                       | 0.0329              | 0.0285               | 0.0272               | 0.0184                  | 0.0129                 | 0.0057                       | 0.0101             |
| HD                        | 0.9708              | 0.9753               | 0.9765               | 0.9854                  | 0.9909                 | 0.9982                       | 0.9937             |
| No of haplotypes          | 107                 | 122                  | 124                  | 166                     | 190                    | 230                          | 188                |
| NUH                       | 64                  | 81                   | 83                   | 132                     | 157                    | 207                          | 152                |
| DC                        | 0.4115              | 0.4692               | 0.4769               | 0.6384                  | 0.7307                 | 0.8846                       | 0.723              |
| % of Unique haplotypes    | 0.2461              | 0.3115               | 0.3192               | 0.5076                  | 0.6038                 | 0.7961                       | 0.5846             |
| <b>Pak-Afg Hazara</b>     |                     |                      |                      |                         |                        |                              |                    |
| <b>No of Samples</b>      | <b>413</b>          | <b>413</b>           | <b>413</b>           | <b>413</b>              | <b>413</b>             | <b>413</b>                   | <b>413</b>         |
| RMP                       | 0.0334              | 0.0268               | 0.0262               | 0.0113                  | 0.007                  | 0.0032                       | 0.0058             |
| HD                        | 0.9689              | 0.9756               | 0.9761               | 0.9911                  | 0.9954                 | 0.9992                       | 0.9966             |
| No. of Haplotypes         | 166                 | 191                  | 193                  | 273                     | 317                    | 380                          | 320                |
| NUH                       | 109                 | 137                  | 139                  | 223                     | 274                    | 357                          | 274                |
| DC                        | 0.4019              | 0.4624               | 0.4673               | 0.661                   | 0.7675                 | 0.92                         | 0.7748             |
| % of Unique Haplotypes    | 0.2639              | 0.3317               | 0.3365               | 0.5399                  | 0.6634                 | 0.8644                       | 0.6634             |
| <b>Baloch Pakistan</b>    |                     |                      |                      |                         |                        |                              |                    |
| <b>No of Samples</b>      | <b>111</b>          | <b>111</b>           | <b>111</b>           | <b>111</b>              | <b>111</b>             | <b>111</b>                   | <b>111</b>         |
| RMP                       | 0.0162              | 0.0136               | 0.0136               | 0.0095                  | 0.0092                 | 0.009                        | 0.0114             |
| HD                        | 0.9928              | 0.9954               | 0.9954               | 0.9995                  | 0.9998                 | 1                            | 0.9975             |
| No of haplotypes          | 97                  | 100                  | 100                  | 108                     | 110                    | 111                          | 101                |
| NUH                       | 93                  | 96                   | 96                   | 105                     | 109                    | 111                          | 95                 |
| DC                        | 0.8738              | 0.9009               | 0.9009               | 0.9729                  | 0.9909                 | 1                            | 0.9099             |
| % of Unique haplotypes    | 0.83783             | 0.8648               | 0.8648               | 0.9459                  | 0.9819                 | 1                            | 0.8558             |

2 RMP= Random Matching Probability ; HD= Haplotype Diversity ; NUH= No. of unique  
3 haplotypes; DC = Discrimination Capacity

4

5

6

1 Table 3: Frequencies of the null allele at DYS448 in various ethnic groups across continents

2

| Continent        | Population         | Number of samples | No of del  | %            | Reference                      |                                       |
|------------------|--------------------|-------------------|------------|--------------|--------------------------------|---------------------------------------|
| <b>Asia</b>      | Hazara (Pak & Afg) | 413               | 55         | 13.31%       | Current Study                  |                                       |
|                  | Korean             | 708               | 6          | 0.85%        | Park et al <sup>49</sup>       |                                       |
|                  | Kalmykia           | 99                | 7          | 7.07%        | Roewer et al <sup>52</sup>     |                                       |
|                  | Japan              | 1079              | 10         | 0.92%        | Mizuno et al <sup>89</sup>     |                                       |
|                  | Malaysia           | 980               | 3          | 0.30%        | Chang et al <sup>48</sup>      |                                       |
|                  | Nepal              | 769               | 3          | 0.39%        | Parkin et al <sup>50</sup>     |                                       |
|                  | Tajikistan         | 124               | 3          | 2.41%        | Balaresque et al <sup>26</sup> |                                       |
|                  | Kyrgyzstan         | 87                | 9          | 10.34        | Balaresque et al <sup>26</sup> |                                       |
|                  | China              | 130               | 3          | 2.30%        | Balaresque et al <sup>26</sup> |                                       |
|                  | Asian              | 330               | 2          | 0.61%        | AmpFISTR Yfiler™ database      |                                       |
|                  | <b>Europe</b>      | Spain             | 247        | 1            | 0.40%                          | Sanchez et al <sup>53</sup>           |
|                  | <b>Africa</b>      | Egypt             | 208        | 1            | 0.48%                          | Balaresque et al <sup>26</sup>        |
|                  | <b>Americas</b>    | Mexico            | 326        | 1            | 0.30%                          | Gutierrez-Alarcon et al <sup>90</sup> |
| African American |                    | 985               | 2          | 0.20%        | AmpFISTR Yfiler™ database      |                                       |
| Caucasian (USA)  |                    | 1276              | 2          | 0.16%        | AmpFISTR Yfiler™ database      |                                       |
|                  |                    | <b>7761</b>       | <b>109</b> | <b>1.40%</b> |                                |                                       |

3

4



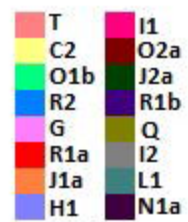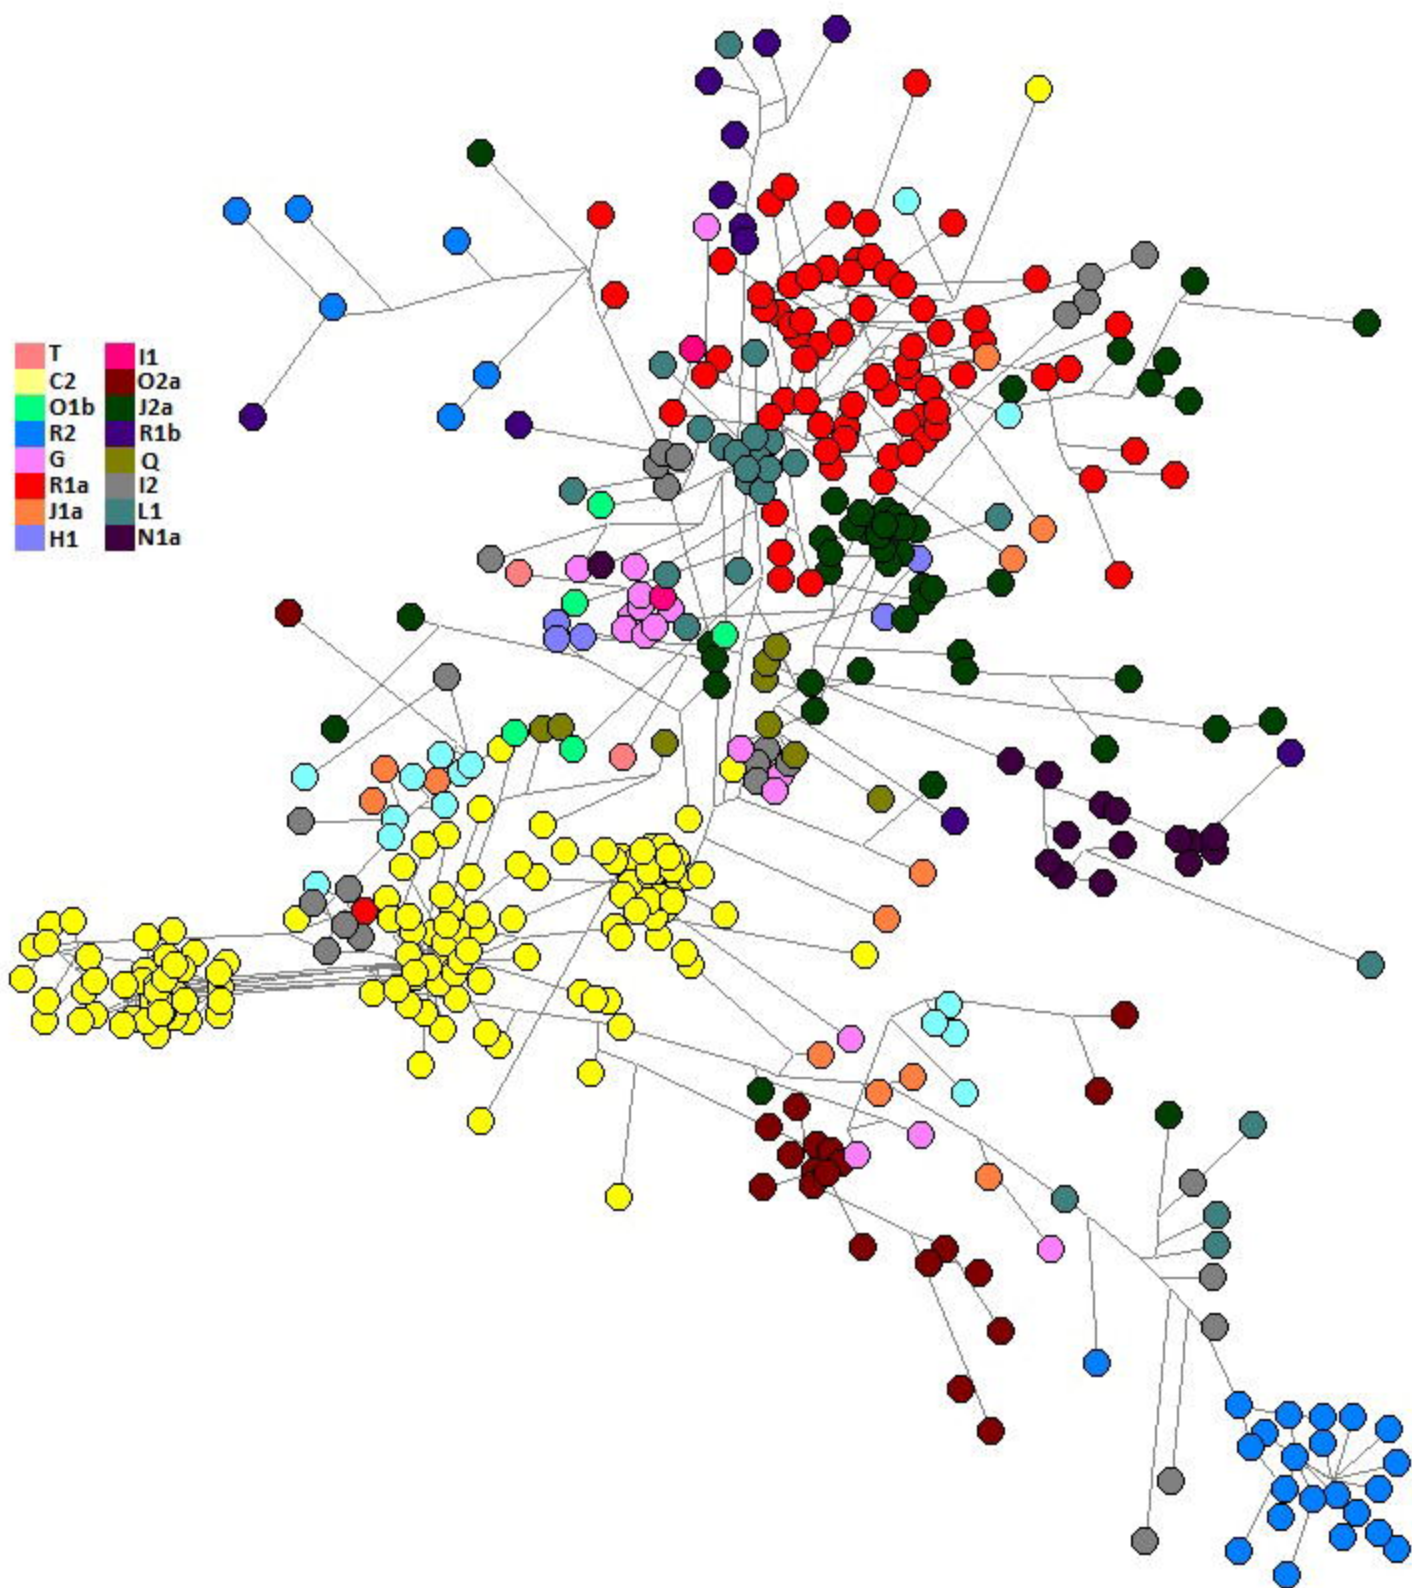

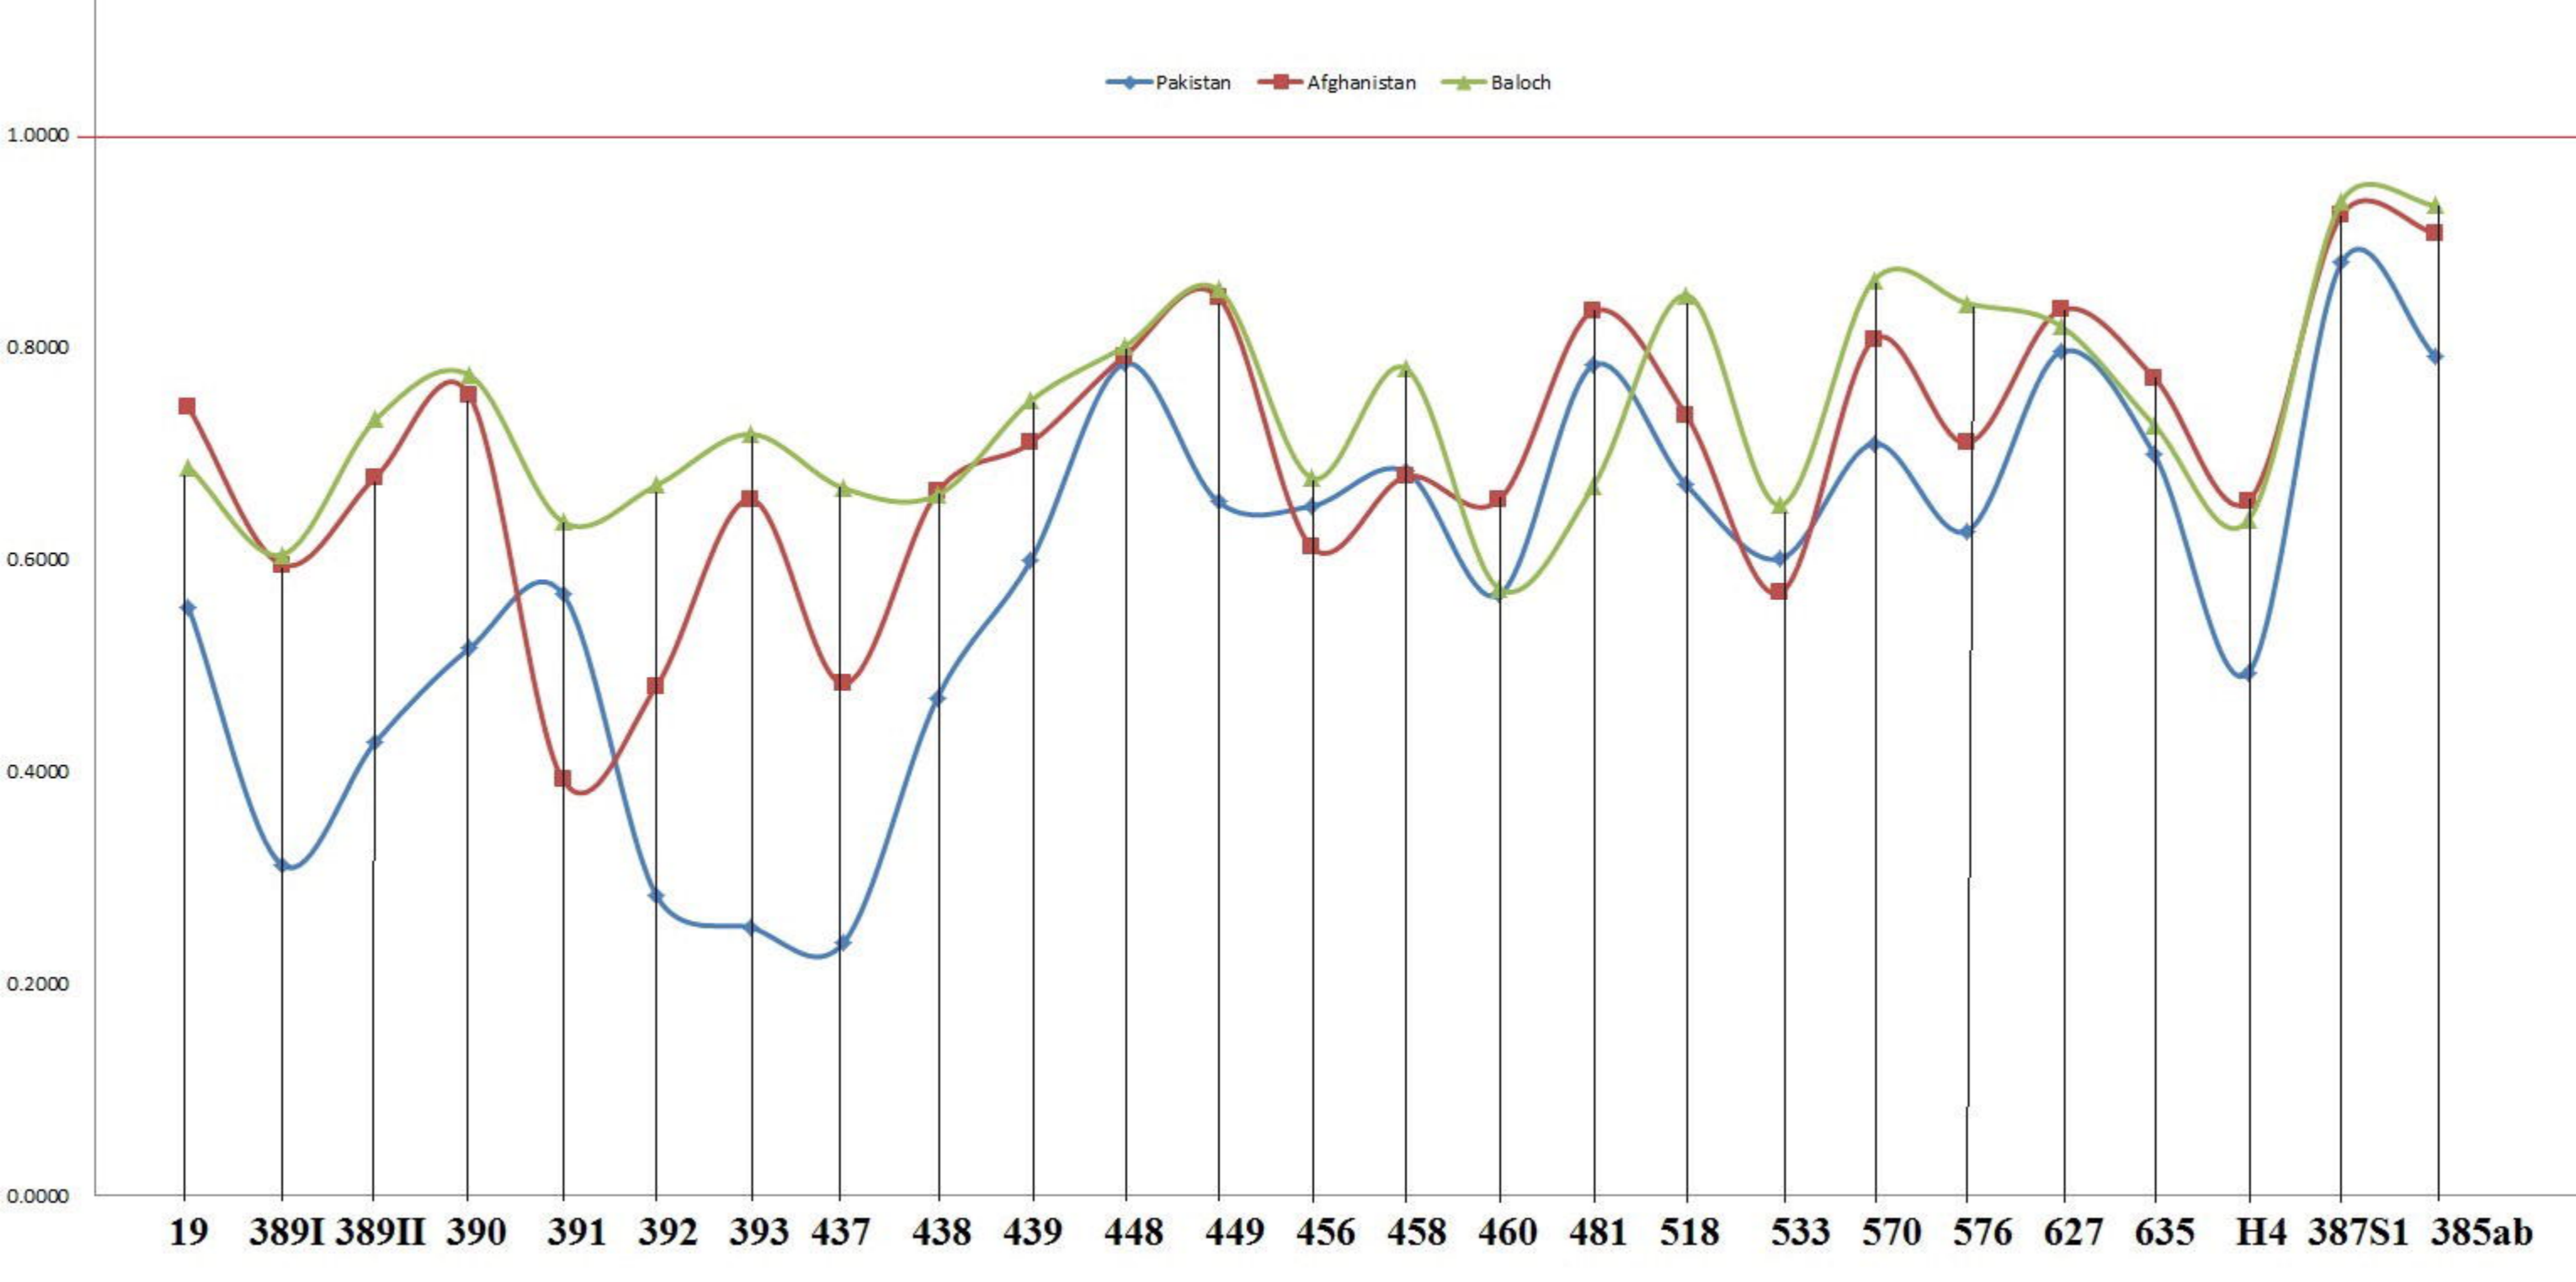

# Linear Discriminant Analysis

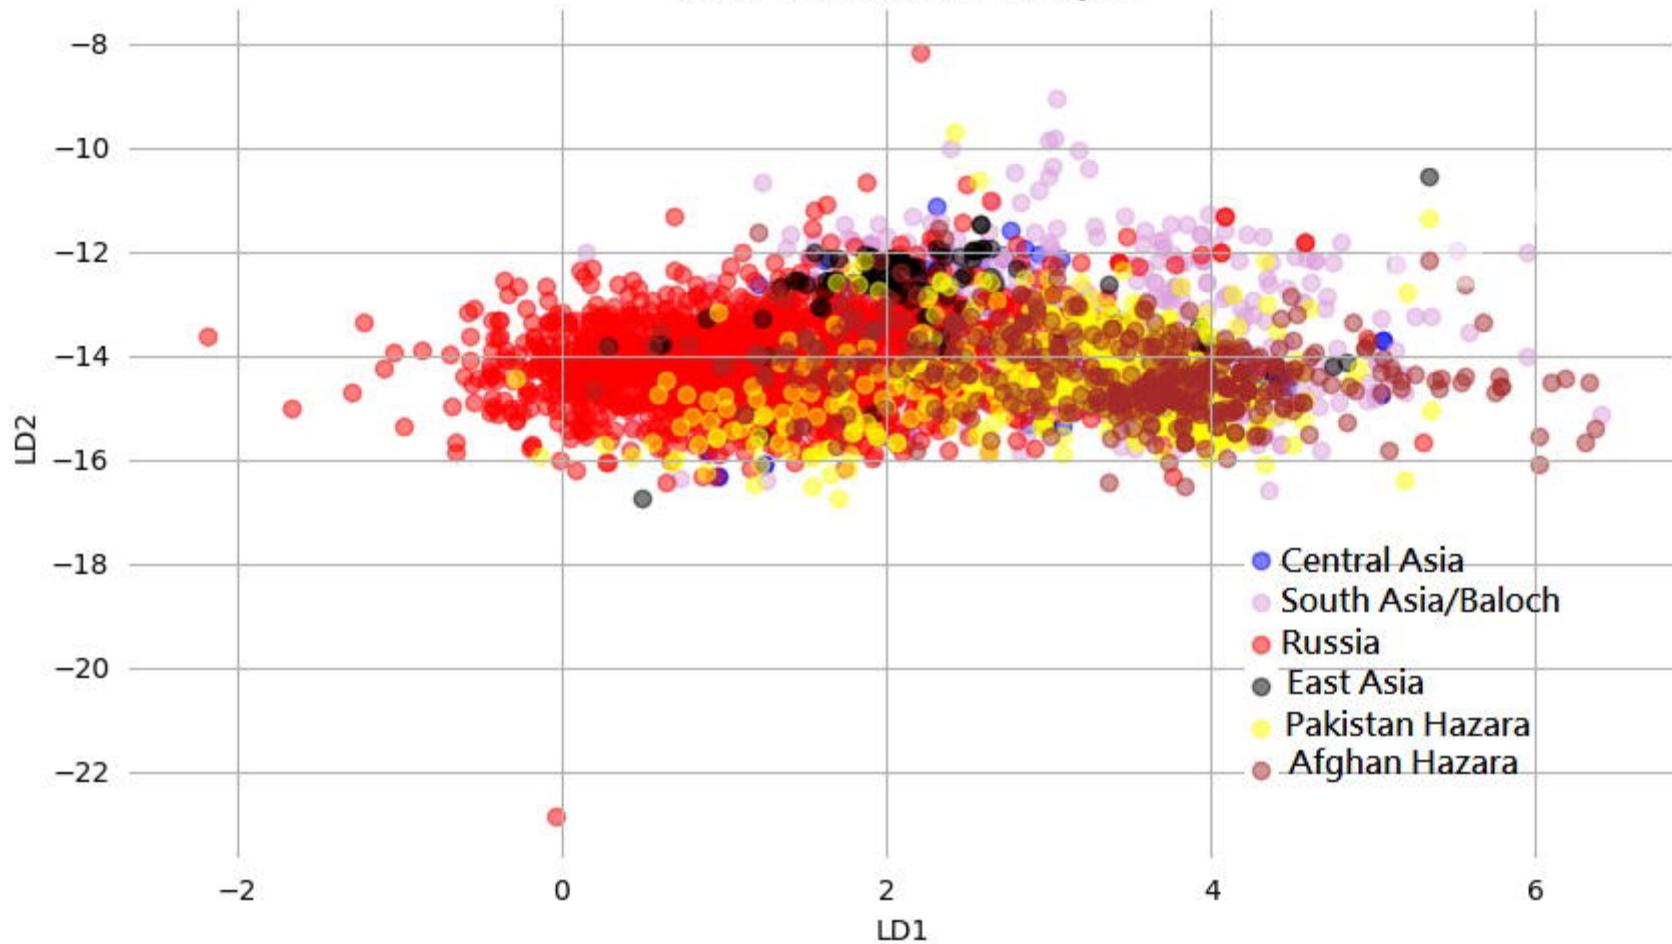

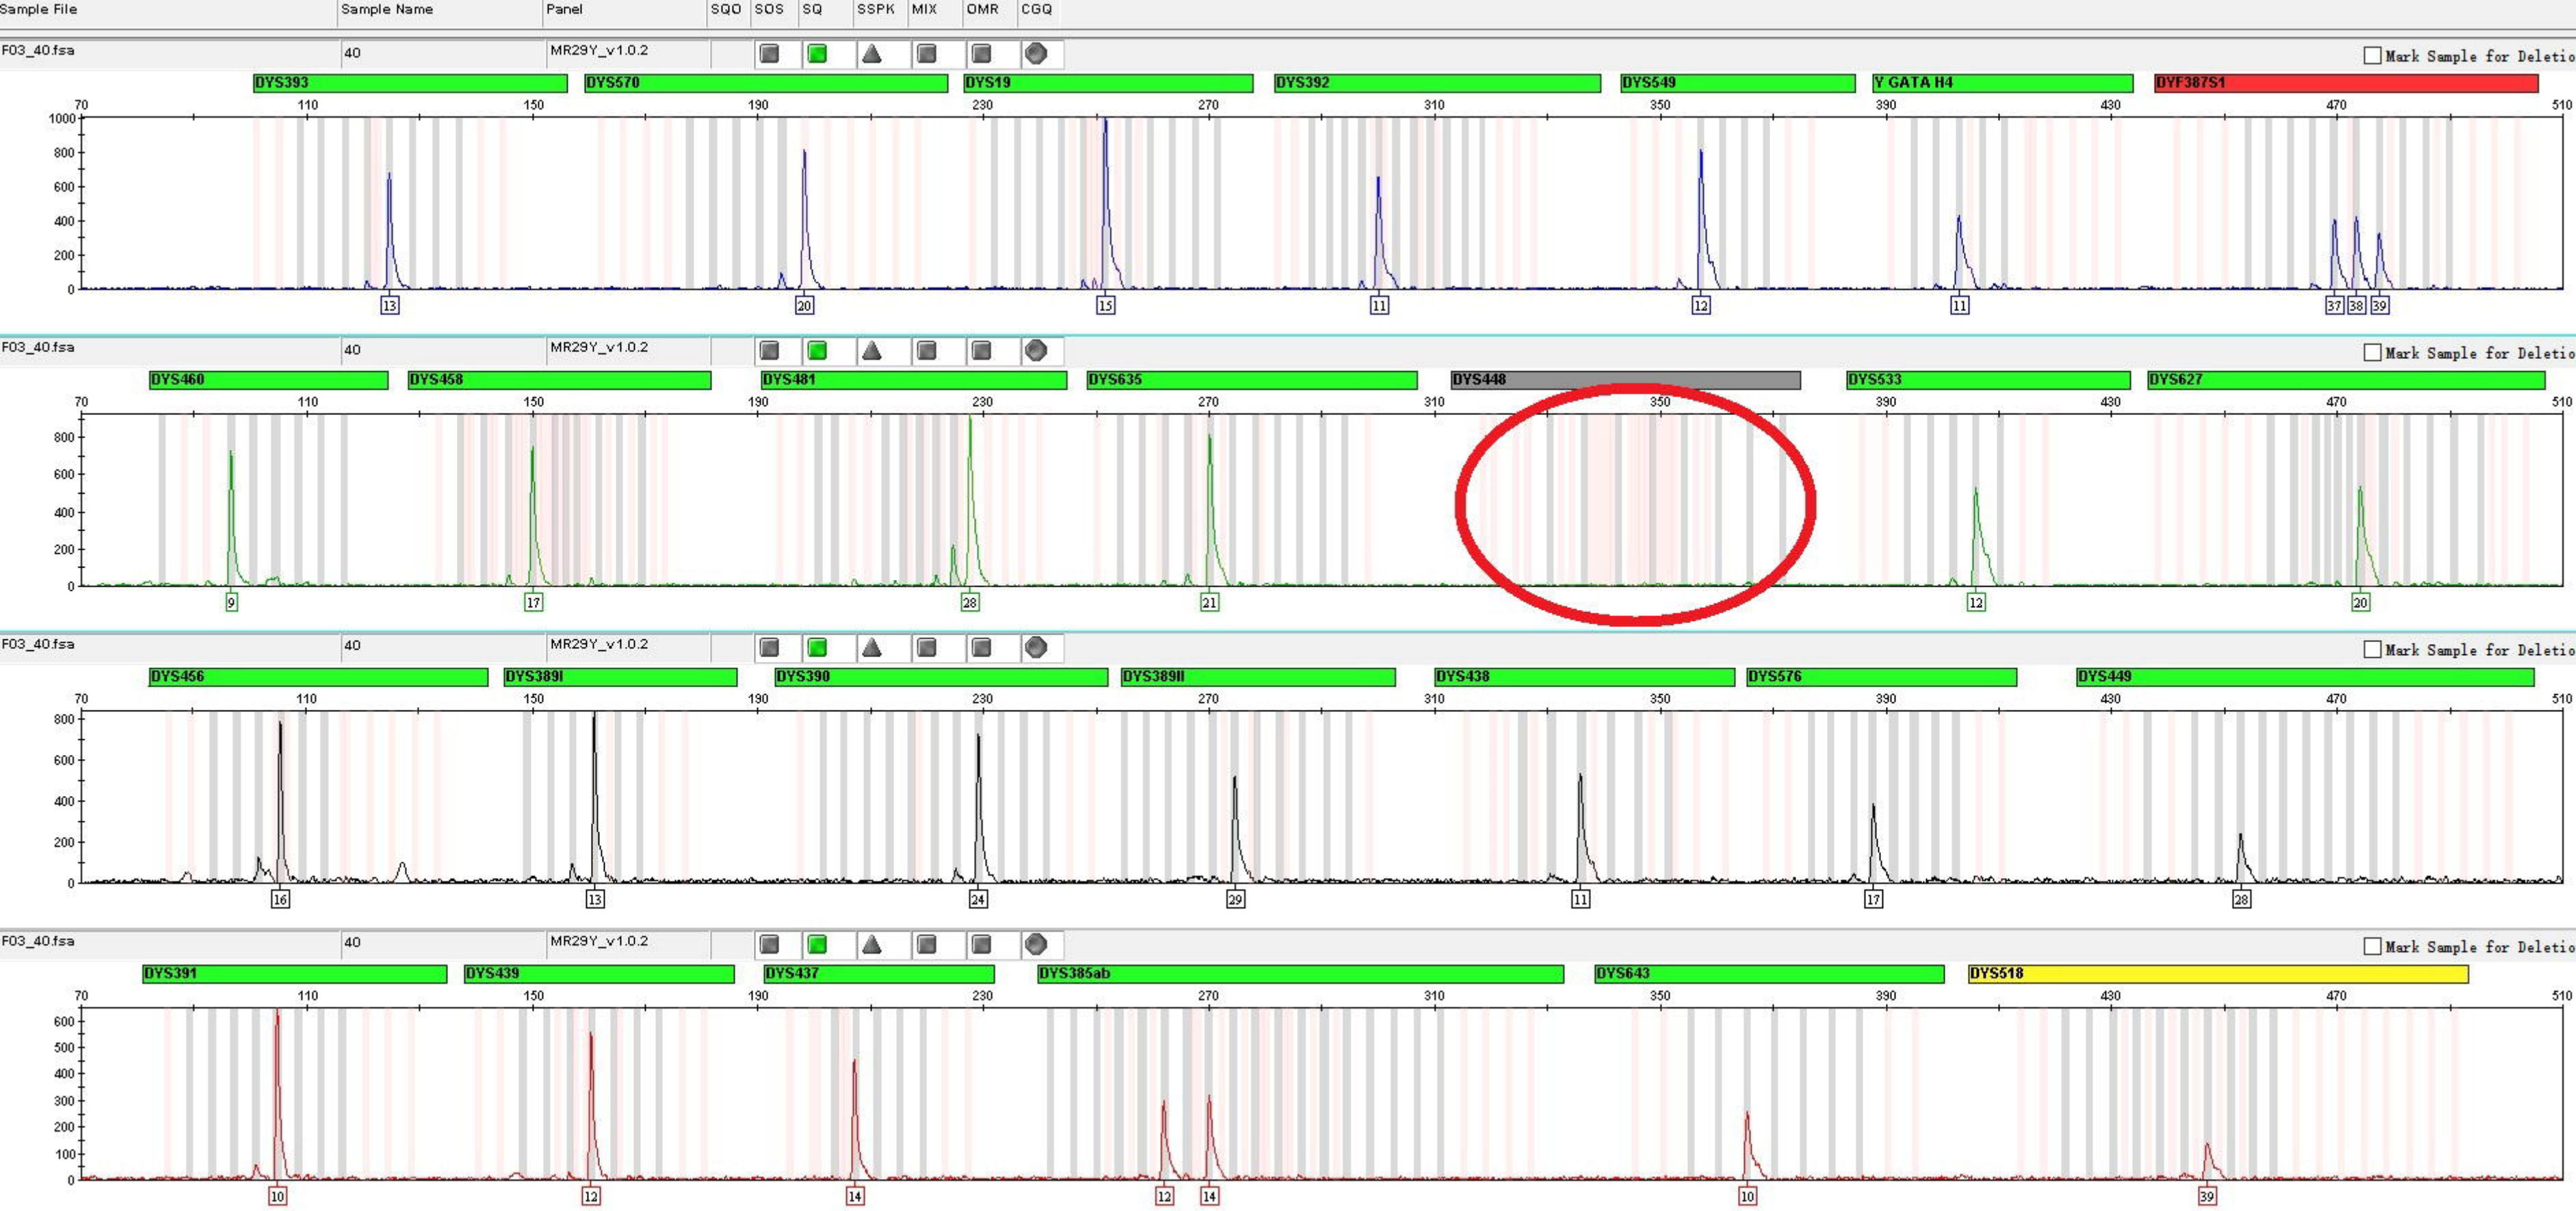

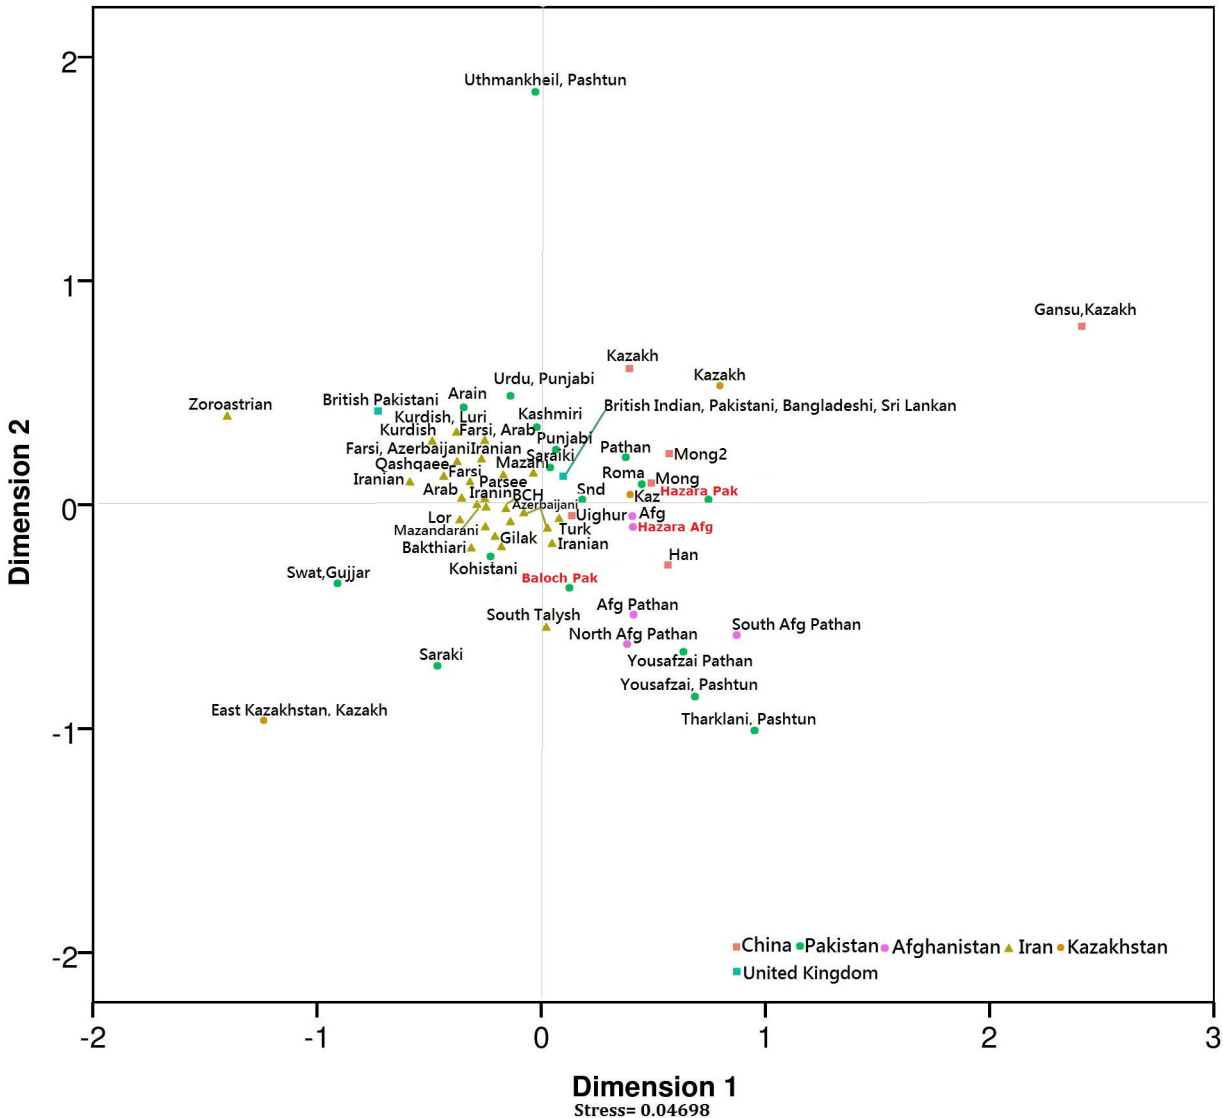

Source: https://www.biorxiv.org/content/10.1101/2020.11.21.392456v1.full.pdf
